# Supplementary material for: The ‘Tommy Atkins’ mango genome reveals candidate genes for fruit quality
Source: PubMed Central journal article supplement (PMC7898432; doi:10.1186/s12870-021-02858-1), 2021-02-22
Supplement: 12870_2021_2858_MOESM1_ESM.pdf [file 12870_2021_2858_MOESM1_ESM.pdf]

## SnpEff: Variant analysis

### Contents

[Summary](#)  
[Variant rate by chromosome](#)  
[Variants by type](#)  
[Number of variants by impact](#)  
[Number of variants by functional class](#)  
[Number of variants by effect](#)  
[Quality histogram](#)  
[InDel length histogram](#)  
[Base variant table](#)  
[Transition vs transversions \(ts/tv\)](#)  
[Allele frequency](#)  
[Allele Count](#)  
[Codon change table](#)  
[Amino acid change table](#)  
[Chromosome variants plots](#)  
[Details by gene](#)

### Summary

|                                                                          |                                                          |
|--------------------------------------------------------------------------|----------------------------------------------------------|
| <b>Genome</b>                                                            | TA4                                                      |
| <b>Date</b>                                                              | 2018-01-01 17:21                                         |
| <b>SnpEff version</b>                                                    | SnpEff 4.3p (build 2017-06-06 09:55), by Pablo Cingolani |
| <b>Command line arguments</b>                                            | SnpEff TA4 TA4_selfvariant.vcf                           |
| <b>Warnings</b>                                                          | 128,022                                                  |
| <b>Errors</b>                                                            | 0                                                        |
| <b>Number of lines (input file)</b>                                      | 5,120,815                                                |
| <b>Number of variants (before filter)</b>                                | 5,394,970                                                |
| <b>Number of not variants (i.e. reference equals alternative)</b>        | 0                                                        |
| <b>Number of variants processed (i.e. after filter and non-variants)</b> | 5,394,956                                                |
| <b>Number of known variants (i.e. non-empty ID)</b>                      | 0 ( 0% )                                                 |
| <b>Number of multi-allelic VCF entries (i.e. more than two alleles)</b>  | 4,368                                                    |
| <b>Number of effects</b>                                                 | 10,095,863                                               |
| <b>Genome total length</b>                                               | 377,290,333                                              |
| <b>Genome effective length</b>                                           | 377,290,333                                              |
| <b>Variant rate</b>                                                      | 1 variant every 69 bases                                 |

### Variants rate details

| Chromosome   | Length             | Variants         | Variants rate |
|--------------|--------------------|------------------|---------------|
| 1            | 17,320,008         | 247,141          | 70            |
| 2            | 17,063,873         | 260,967          | 65            |
| 3            | 21,566,805         | 288,912          | 74            |
| 4            | 22,357,487         | 255,999          | 87            |
| 5            | 14,540,018         | 227,490          | 63            |
| 6            | 10,680,009         | 134,363          | 79            |
| 7            | 13,133,232         | 218,581          | 60            |
| 8            | 14,750,018         | 223,076          | 66            |
| 9            | 21,055,410         | 317,903          | 66            |
| 10           | 11,063,414         | 146,226          | 75            |
| 11           | 17,675,019         | 197,115          | 89            |
| 12           | 14,336,529         | 227,439          | 63            |
| 13           | 15,099,493         | 205,623          | 73            |
| 14           | 13,335,999         | 208,487          | 63            |
| 15           | 16,178,320         | 219,588          | 73            |
| 16           | 21,434,198         | 329,642          | 65            |
| 17           | 11,746,059         | 157,361          | 74            |
| 18           | 16,863,820         | 231,421          | 72            |
| 19           | 22,398,858         | 349,731          | 64            |
| 20           | 16,105,987         | 443,146          | 36            |
| 10000001     | 48,585,777         | 504,745          | 96            |
| <b>Total</b> | <b>377,290,333</b> | <b>5,394,956</b> | <b>69</b>     |

### Number variants by type

| Type         | Total            |
|--------------|------------------|
| <b>SNP</b>   | 3,946,854        |
| <b>MNP</b>   | 1,051,633        |
| <b>Total</b> | <b>5,394,956</b> |

| Type         | Total            |
|--------------|------------------|
| INS          | 138,977          |
| DEL          | 146,654          |
| MIXED        | 110,838          |
| INV          | 0                |
| DUP          | 0                |
| BND          | 0                |
| INTERVAL     | 0                |
| <b>Total</b> | <b>5,394,956</b> |

Number of effects by impact

| Type (alphabetical order) | Count     | Percent |
|---------------------------|-----------|---------|
| HIGH                      | 8,352     | 0.083%  |
| LOW                       | 136,667   | 1.354%  |
| MODERATE                  | 149,461   | 1.48%   |
| MODIFIER                  | 9,801,383 | 97.083% |

Number of effects by functional class

| Type (alphabetical order) | Count   | Percent |
|---------------------------|---------|---------|
| MISSENSE                  | 129,328 | 53.791% |
| NONSENSE                  | 1,484   | 0.617%  |
| SILENT                    | 109,615 | 45.592% |

Missense / Silent ratio: 1.1798

Number of effects by type and region

| Type                                           |           |         | Region                    |           |         |
|------------------------------------------------|-----------|---------|---------------------------|-----------|---------|
| Type (alphabetical order)                      | Count     | Percent | Type (alphabetical order) | Count     | Percent |
| 3_prime_UTR_variant                            | 72,021    | 0.711%  | DOWNSTREAM                | 2,123,353 | 21.032% |
| 5_prime_UTR_premature_start_codon_gain_variant | 5,080     | 0.05%   | EXON                      | 265,703   | 2.632%  |
| 5_prime_UTR_variant                            | 42,434    | 0.419%  | INTERGENIC                | 4,125,552 | 40.864% |
| conservative_inframe_deletion                  | 815       | 0.008%  | INTRON                    | 1,045,061 | 10.351% |
| conservative_inframe_insertion                 | 750       | 0.007%  | SPLICE_SITE_ACCEPTOR      | 1,271     | 0.013%  |
| disruptive_inframe_deletion                    | 514       | 0.005%  | SPLICE_SITE_DONOR         | 1,251     | 0.012%  |
| disruptive_inframe_insertion                   | 374       | 0.004%  | SPLICE_SITE_REGION        | 21,175    | 0.21%   |
| downstream_gene_variant                        | 2,123,362 | 20.973% | TRANSCRIPT                | 608       | 0.006%  |
| frameshift_variant                             | 3,189     | 0.031%  | UPSTREAM                  | 2,392,499 | 23.698% |
| initiator_codon_variant                        | 30        | 0%      | UTR_3_PRIME               | 71,932    | 0.712%  |
| intergenic_region                              | 4,125,552 | 40.749% | UTR_5_PRIME               | 47,458    | 0.47%   |
| intragenic_variant                             | 156       | 0.002%  |                           |           |         |
| intron_variant                                 | 1,065,055 | 10.52%  |                           |           |         |
| missense_variant                               | 148,074   | 1.463%  |                           |           |         |
| non_coding_transcript_variant                  | 452       | 0.004%  |                           |           |         |
| splice_acceptor_variant                        | 1,304     | 0.013%  |                           |           |         |
| splice_donor_variant                           | 1,307     | 0.013%  |                           |           |         |
| splice_region_variant                          | 25,421    | 0.251%  |                           |           |         |
| start_lost                                     | 336       | 0.003%  |                           |           |         |
| stop_gained                                    | 2,021     | 0.02%   |                           |           |         |
| stop_lost                                      | 496       | 0.005%  |                           |           |         |
| stop_retained_variant                          | 195       | 0.002%  |                           |           |         |
| synonymous_variant                             | 112,764   | 1.114%  |                           |           |         |
| upstream_gene_variant                          | 2,392,499 | 23.631% |                           |           |         |

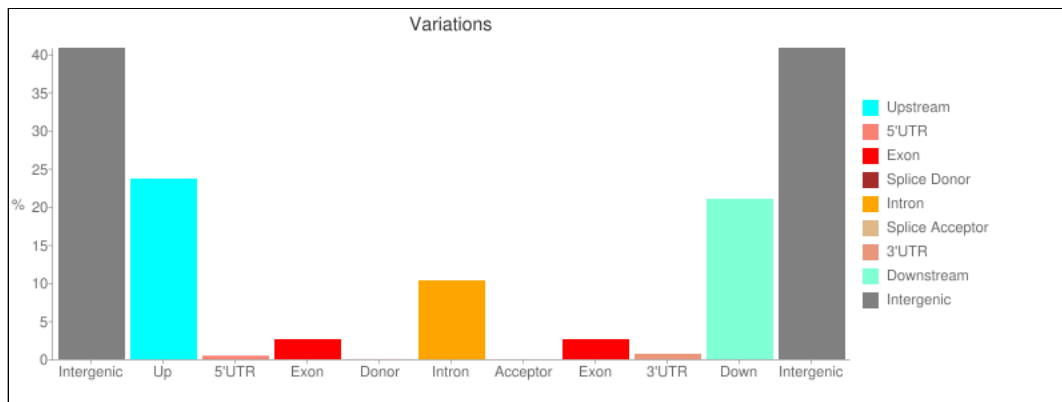

**Quality:**

|                           |                                                                                                                                                                                                                                                                                                       |
|---------------------------|-------------------------------------------------------------------------------------------------------------------------------------------------------------------------------------------------------------------------------------------------------------------------------------------------------|
| <b>Min</b>                | 0                                                                                                                                                                                                                                                                                                     |
| <b>Max</b>                | 2,556,390                                                                                                                                                                                                                                                                                             |
| <b>Mean</b>               | 5,139,301                                                                                                                                                                                                                                                                                             |
| <b>Median</b>             | 4,691                                                                                                                                                                                                                                                                                                 |
| <b>Standard deviation</b> | 25,296.375                                                                                                                                                                                                                                                                                            |
| <b>Values</b>             | 0,1,2,3,4,5,6,7,8,9,10,11,12,13,14,15,16,17,18,19,20,21,22,23,24,25,26,27,28,29,30,31,32,33,34,35,36,37,38,39,40,41,42,43,44,45,46,47,48,49,50,51,52,53,54,55,56,57,58,59,60,61,62,63,64,65,66,67,68,69,70,71,72,73,74,75,76,77,78,79,80,81,82,83,84,85,86,87,88,89,90,91,92,93,94,95,96,97,98,99,100 |
| <b>Count</b>              | 1583,142,98,85,74,50,54,42,61,58,48,63,60,51,42,50,54,55,55,53,61,75,40,58,57,40,55,55,47,46,58,61,60,51,70,57,50,69,55,45,46,46,58,58,44,57,56,5                                                                                                                                                     |

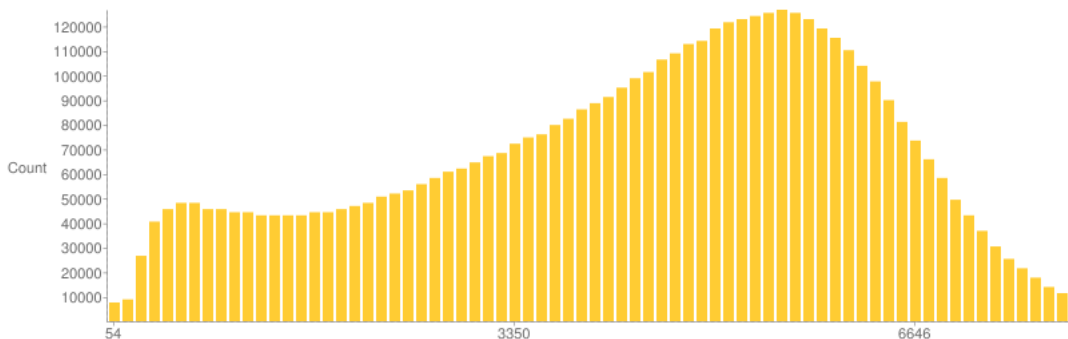

**Insertions and deletions length:**

|                           |                                                                                                                                          |
|---------------------------|------------------------------------------------------------------------------------------------------------------------------------------|
| <b>Min</b>                | 0                                                                                                                                        |
| <b>Max</b>                | 37                                                                                                                                       |
| <b>Mean</b>               | 1.435                                                                                                                                    |
| <b>Median</b>             | 1                                                                                                                                        |
| <b>Standard deviation</b> | 2.626                                                                                                                                    |
| <b>Values</b>             | 0,1,2,3,4,5,6,7,8,9,10,11,12,13,14,15,16,17,18,19,20,21,22,23,24,25,26,27,28,29,30,32,33,35,37                                           |
| <b>Count</b>              | 82444,164847,8613,5907,3582,3271,1972,2294,2011,1960,1575,1756,1079,911,744,622,463,422,299,236,190,130,100,67,44,41,23,14,3,1,3,1,1,3,2 |

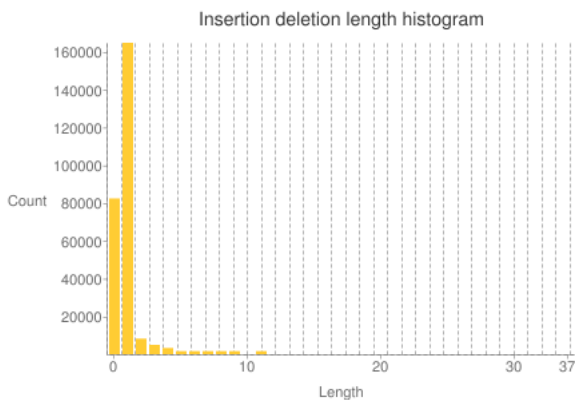

**Base changes (SNPs)**

|   | A       | C       | G       | T       |
|---|---------|---------|---------|---------|
| A | 0       | 142,355 | 691,920 | 196,913 |
| C | 142,764 | 0       | 99,547  | 697,961 |
| G | 699,883 | 99,884  | 0       | 143,020 |
| T | 197,267 | 693,330 | 142,010 | 0       |

**Ts/Tv (transitions / transversions)**

Note: Only SNPs are used for this statistic.  
 Note: This Ts/Tv ratio is a 'raw' ratio (ratio of observed events).

|                      |           |
|----------------------|-----------|
| <b>Transitions</b>   | 2,768,385 |
| <b>Transversions</b> | 1,157,453 |
| <b>Ts/Tv ratio</b>   | 2.3918    |

**All variants:**

Sample ,unknown>Total  
 Transitions ,2768385,2768385  
 Transversions ,1157453,1157453  
 Ts/Tv ,2.392,2.392

**Only known variants** (i.e. the ones having a non-empty ID field):

No results available (empty input?)

**Allele frequency**

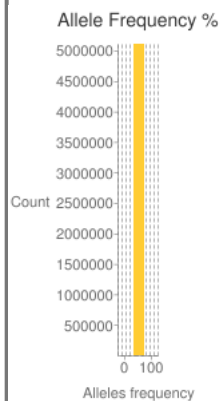

|                           |                  |
|---------------------------|------------------|
| <b>Min</b>                | 0                |
| <b>Max</b>                | 100              |
| <b>Mean</b>               | 50.11            |
| <b>Median</b>             | 50               |
| <b>Standard deviation</b> | 2.342            |
| <b>Values</b>             | 0,50,100         |
| <b>Count</b>              | 10,5109556,11249 |

**Allele Count**

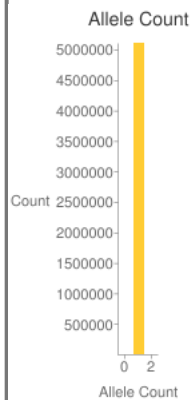

|                           |                  |
|---------------------------|------------------|
| <b>Min</b>                | 0                |
| <b>Max</b>                | 2                |
| <b>Mean</b>               | 1.002            |
| <b>Median</b>             | 1                |
| <b>Standard deviation</b> | 0.047            |
| <b>Values</b>             | 0,1,2            |
| <b>Count</b>              | 10,5109556,11249 |

**Hom/Het per sample**

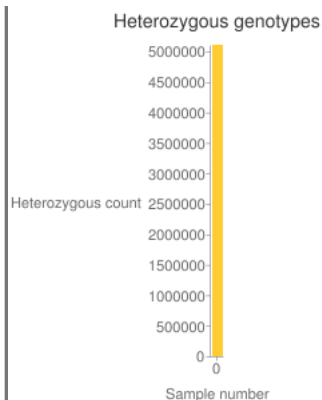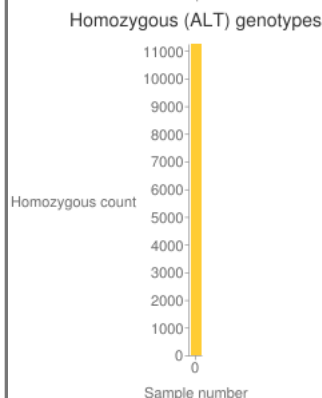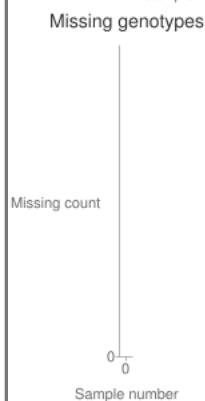

Sample\_names , unknown  
 Reference , 10  
 Het , 5109556  
 Hom , 11249  
 Missing , 0

**Codon changes**

How to read this table:

- Rows are reference codons and columns are changed codons. E.g. Row 'AAA' column 'TAA' indicates how many 'AAA' codons have been replaced by 'TAA' codons.
- Red background colors indicate that more changes happened (heat-map).
- Diagonals are indicated using grey background color
- WARNING: This table may include different translation codon tables (e.g. mamalian DNA and mitochondrial DNA).

|     | -   | AAA        | AAC       | AAG       | AAT       | ACA       | ACC       | ACG       | ACT       | AGA       | AGC       | AGG       | AGT   | ATA | ATC | ATG | ATT | CAA | CAC | CAG | CAT |
|-----|-----|------------|-----------|-----------|-----------|-----------|-----------|-----------|-----------|-----------|-----------|-----------|-------|-----|-----|-----|-----|-----|-----|-----|-----|
| -   |     | 81         | 54        | 89        | 90        | 49        | 31        | 15        | 56        | 45        | 33        | 31        | 64    | 36  | 23  | 55  | 48  | 75  | 45  | 59  | 80  |
| AAA | 233 | <b>117</b> | 373       | 2,017     | 518       | 373       | 3         | 4         | 3         | 992       | 4         | 17        | 6     | 213 | 5   | 7   | 11  | 471 | 1   | 8   | 6   |
| AAC | 111 | 403        | <b>60</b> | 399       | 2,037     | 6         | 196       | 3         | 4         | 7         | 809       | 6         | 11    | 2   | 120 | 2   | 5   | 13  | 145 | 3   | 6   |
| AAG | 202 | 1,985      | 408       | <b>95</b> | 452       | 20        | 2         | 224       | 1         | 21        | 5         | 1,014     | 10    | 5   | 3   | 318 | 8   | 6   | 4   | 356 | 2   |
| AAT | 151 | 499        | 2,068     | 414       | <b>83</b> | 7         | 7         | 4         | 369       | 9         | 23        | 13        | 1,096 | 7   | 7   | 4   | 278 | 5   | 3   | 1   | 354 |
| ACA | 104 | 349        | 8         | 8         | 5         | <b>59</b> | 415       | 1,573     | 574       | 293       | 5         | 5         | 4     | 661 | 9   | 62  | 5   | 5   |     |     | 1   |
| ACC | 79  | 2          | 224       | 3         | 7         | 396       | <b>35</b> | 271       | 1,630     |           | 265       | 2         | 5     | 4   | 327 | 8   | 15  |     | 1   |     |     |
| ACG | 27  | 4          | 6         | 231       | 6         | 1,547     | 295       | <b>10</b> | 422       | 1         | 3         | 141       | 2     | 24  | 9   | 825 | 7   |     |     | 3   |     |
| ACT | 99  | 7          | 18        | 5         | 386       | 594       | 1,723     | 429       | <b>47</b> | 1         | 5         | 1         | 493   | 5   | 12  | 12  | 783 |     | 2   |     | 3   |
| AGA | 92  | 1,002      | 2         | 25        | 9         | 264       |           | 3         | 5         | <b>46</b> | 170       | 1,032     | 194   | 189 | 4   | 4   | 2   | 13  |     | 2   |     |
| AGC | 62  | 17         | 760       | 9         | 15        | 6         | 241       | 3         | 11        | 168       | <b>52</b> | 148       | 1,236 | 1   | 122 | 2   | 9   |     | 5   |     |     |
| AGG | 68  | 22         | 1         | 962       | 5         | 7         |           | 133       | 2         | 1,049     | 164       | <b>30</b> | 184   | 2   | 3   | 149 | 5   |     |     | 5   | 1   |

|     | -   | AAA   | AAC | AAG   | AAT   | ACA   | ACC | ACG | ACT   | AGA | AGC   | AGG | AGT | ATA   | ATC   | ATG | ATT   | CAA   | CAC   | CAG | CAT   |
|-----|-----|-------|-----|-------|-------|-------|-----|-----|-------|-----|-------|-----|-----|-------|-------|-----|-------|-------|-------|-----|-------|
| AGT | 98  | 6     | 15  | 12    | 1,124 | 4     | 5   | 5   | 495   | 177 | 1,217 | 202 | 51  | 1     |       | 4   | 288   | 1     |       |     | 11    |
| ATA | 58  | 195   | 1   | 10    | 8     | 616   | 5   | 16  | 4     | 173 | 2     | 3   | 4   | 32    | 445   | 879 | 617   | 10    | 1     |     |       |
| ATC | 58  | 6     | 94  | 1     | 9     | 7     | 336 | 5   | 13    |     | 93    | 1   | 2   | 487   | 29    | 269 | 1,750 |       |       |     | 1     |
| ATG | 124 | 8     | 1   | 341   | 24    | 58    | 6   | 848 | 15    | 3   | 3     | 201 | 7   | 1,004 | 288   | 65  | 421   |       |       | 3   | 1     |
| ATT | 122 | 5     | 7   | 2     | 297   | 4     | 8   | 14  | 772   | 4   | 7     | 3   | 271 | 568   | 1,762 | 378 | 90    |       |       |     | 6     |
| CAA | 119 | 482   | 3   | 12    | 1     | 5     | 1   |     | 1     | 8   | 2     |     |     | 5     |       |     | 60    | 231   | 1,586 | 279 |       |
| CAC | 56  | 2     | 146 |       | 9     | 1     |     |     |       |     | 2     |     |     |       |       | 1   |       | 184   | 22    | 249 | 1,072 |
| CAG | 92  | 7     | 1   | 340   | 3     | 1     | 2   |     |       | 3   | 1     | 10  | 1   | 1     | 2     | 2   |       | 1,528 | 256   | 42  | 274   |
| CAT | 103 | 8     | 6   | 3     | 340   | 1     |     |     | 4     |     |       |     | 10  |       |       | 1   | 4     | 316   | 1,118 | 263 | 49    |
| CCA | 135 | 5     | 1   |       |       | 157   | 2   |     | 6     | 2   |       |     |     | 7     |       |     |       | 250   | 3     | 13  | 2     |
| CCC | 77  |       | 1   |       |       | 2     | 90  | 1   | 4     |     | 1     |     |     |       | 3     |     |       | 3     | 56    | 1   | 2     |
| CCG | 61  |       |     | 4     |       | 4     |     | 53  | 2     |     |       | 1   |     |       |       | 1   |       | 7     | 2     | 142 |       |
| CCT | 142 |       |     |       | 3     | 2     | 4   |     | 253   | 1   |       |     | 4   |       |       | 1   | 3     |       | 4     | 3   | 200   |
| CGA | 35  | 10    |     |       |       | 2     |     |     |       | 356 | 3     | 4   |     | 1     | 1     | 1   |       | 1,027 | 5     | 14  | 14    |
| CGC | 22  | 1     | 6   |       |       |       |     |     |       | 1   | 101   | 1   | 1   |       | 4     |     |       | 5     | 465   | 5   | 14    |
| CGG | 19  |       |     | 5     | 1     |       |     | 3   |       | 12  | 1     | 270 | 1   | 1     | 1     |     |       | 15    | 3     | 908 | 9     |
| CGT | 34  | 1     |     |       | 11    | 2     |     |     | 1     | 7   | 5     | 2   | 138 |       |       |     | 4     | 11    | 13    | 5   | 974   |
| CTA | 47  | 1     |     |       |       | 6     |     |     |       | 1   |       |     |     |       | 187   |     | 3     | 6     | 193   |     | 3     |
| CTC | 70  |       | 1   |       |       |       | 2   |     |       |     | 1     |     | 2   | 3     | 166   | 2   | 7     | 3     | 83    | 2   | 3     |
| CTG | 61  | 1     | 1   | 4     | 1     | 1     |     | 2   |       |     |       | 3   |     | 2     |       | 282 | 7     | 3     |       | 222 | 1     |
| CTT | 112 |       | 2   | 1     |       |       |     |     | 13    |     |       |     | 3   | 6     | 4     | 2   | 391   | 5     |       | 5   | 226   |
| GAA | 253 | 1,470 | 5   | 31    | 13    | 12    |     | 1   |       | 29  |       | 1   | 1   | 7     | 1     | 2   | 1     | 517   | 1     | 3   | 3     |
| GAC | 104 | 8     | 621 | 11    | 23    |       | 8   | 1   | 2     | 1   | 15    | 3   |     |       | 3     | 2   |       | 127   |       |     | 4     |
| GAG | 178 | 18    | 13  | 1,166 | 14    |       |     | 4   | 1     | 9   |       | 21  | 2   |       |       | 8   |       | 7     | 1     | 529 | 3     |
| GAT | 257 | 7     | 23  | 13    | 1,370 |       | 1   | 1   | 3     | 4   | 3     |     | 13  |       |       | 1   | 12    | 1     | 5     | 5   | 365   |
| GCA | 118 | 13    |     |       |       | 1,160 | 10  | 15  | 8     | 10  | 3     |     | 1   | 22    |       |     |       | 11    | 1     |     |       |
| GCC | 96  |       | 14  | 2     |       | 4     | 643 | 2   | 18    | 1   | 8     |     |     |       | 11    |     | 2     |       | 1     | 1   |       |
| GCG | 32  |       |     | 5     |       | 15    | 2   | 225 | 5     | 2   |       | 3   |     | 1     |       | 18  |       |       |       | 3   |       |
| GCT | 108 |       | 1   |       | 8     | 4     | 29  | 3   | 1,242 | 1   | 2     | 1   | 5   | 2     | 1     |     | 29    | 1     |       | 1   | 5     |
| GGA | 164 | 28    |     | 1     | 1     | 1     |     |     | 1     | 726 | 3     | 14  | 8   | 5     |       | 3   | 1     | 9     |       |     |       |
| GGC | 88  |       | 19  | 1     | 2     |       | 3   |     |       | 3   | 580   | 5   | 15  |       | 3     |     |       |       | 5     |     |       |
| GGG | 94  | 1     | 3   | 14    |       |       | 1   | 3   |       | 5   | 2     | 444 | 7   |       |       | 1   |       | 1     |       | 15  |       |
| GGT | 160 | 2     | 3   | 1     | 25    |       |     |     | 8     | 2   | 11    | 3   | 996 |       | 1     | 2   | 5     |       | 1     |     | 13    |
| GTA | 54  | 3     |     | 1     |       | 18    | 3   |     | 1     | 8   | 1     |     | 1   | 847   | 6     | 12  | 10    | 2     |       |     | 1     |
| GTC | 35  |       | 2   |       |       |       | 8   |     |       |     | 2     |     | 1   | 5     | 753   | 5   | 14    |       |       | 1   | 1     |
| GTG | 75  | 2     |     | 7     |       | 4     |     | 17  |       |     |       | 1   | 2   | 20    | 7     | 882 | 3     |       | 1     | 2   |       |
| GTT | 129 | 2     |     |       | 6     | 3     |     |     | 18    | 1   |       |     | 13  | 8     | 18    | 5   | 1,644 |       | 1     |     | 1     |
| TAA | 19  | 24    |     |       |       |       |     |     |       |     |       |     |     |       |       |     |       | 38    |       | 1   |       |
| TAC | 53  | 5     | 129 | 3     | 6     |       | 2   | 1   |       |     | 3     |     |     |       | 2     |     |       | 2     | 334   | 2   | 9     |
| TAG | 13  |       |     | 13    |       |       |     |     |       |     |       |     |     |       |       |     |       |       |       |     | 42    |
| TAT | 96  | 2     | 6   |       | 290   | 2     |     |     |       |     | 1     |     | 7   | 3     |       |     | 2     | 5     | 7     | 1   | 727   |
| TCA | 131 | 6     |     |       | 2     | 270   | 4   | 7   | 4     | 1   |       |     |     | 6     | 1     | 1   | 1     | 6     |       |     | 1     |
| TCC | 62  |       |     |       | 1     | 151   |     | 8   |       | 5   | 1     |     |     |       | 2     |     | 1     |       | 1     |     | 2     |
| TCG | 35  |       |     |       | 1     | 2     | 1   | 50  | 1     | 1   |       |     |     |       |       | 9   | 1     |       |       |     |       |
| TCT | 193 | 2     |     |       | 15    | 3     | 6   |     | 325   |     | 1     |     | 9   |       | 4     |     | 11    | 1     |       |     | 13    |
| TGA | 18  |       |     |       |       |       |     |     |       | 14  |       |     |     |       |       |     |       | 5     |       |     |       |
| TGC | 42  |       | 3   |       | 1     | 1     | 1   |     |       | 2   | 107   | 2   | 7   |       |       | 1   |       |       | 25    |     |       |
| TGG | 50  |       |     | 1     |       |       |     |     |       | 2   | 3     | 135 | 2   |       |       | 6   |       |       |       | 39  | 1     |
| TGT | 44  |       |     |       | 2     |       | 1   |     | 1     |     | 3     |     | 234 |       |       |     |       | 4     | 4     | 3   | 36    |
| TTA | 80  | 6     | 1   |       | 2     | 1     |     |     | 2     | 4   |       |     |     | 226   | 4     | 6   | 2     | 3     |       |     | 1     |
| TTC | 88  |       | 3   |       |       |       | 1   |     |       | 2   |       |     |     | 2     | 162   | 3   | 12    | 1     | 3     | 1   |       |
| TTG | 120 |       |     | 5     | 1     | 3     |     | 4   | 2     |     | 1     |     |     | 5     |       | 417 | 4     |       |       | 7   | 1     |
| TTT | 171 |       |     |       | 1     | 7     |     | 1   |       | 9   | 1     |     | 3   | 7     | 5     | 5   | 369   |       | 1     | 1   | 12    |

**Amino acid changes**

How to read this table:

- Rows are reference amino acids and columns are changed amino acids. E.g. Row 'A' column 'E' indicates how many 'A' amino acids have been replaced by 'E' amino acids.
- Red background colors indicate that more changes happened (heat-map).
- Diagonals are indicated using grey background color
- WARNING: This table may include different translation codon tables (e.g. mammalian DNA and mitochondrial DNA).

|   | *   | -   | ?     | A      | C     | D   | E   | F   | G     | H   | I   | K   | L   | M  | N   | P   | Q   | R   | S     | T     | V    |
|---|-----|-----|-------|--------|-------|-----|-----|-----|-------|-----|-----|-----|-----|----|-----|-----|-----|-----|-------|-------|------|
| * | 209 | 42  | 8     |        | 9     | 2   | 39  | 1   | 8     |     |     | 37  | 47  |    |     |     | 86  | 71  | 41    |       |      |
| - | 40  |     | 1,381 | 154    | 49    | 148 | 214 | 126 | 168   | 125 | 107 | 170 | 225 | 55 | 144 | 210 | 134 | 122 | 353   | 151   | 1:   |
| ? |     |     |       |        |       |     |     |     |       |     |     |     |     |    |     |     |     |     |       |       |      |
| A | 4   | 339 | 15    | 12,203 | 14    | 424 | 594 | 16  | 1,075 | 7   | 68  | 20  | 49  | 18 | 23  | 826 | 17  | 24  | 1,330 | 3,385 | 3,2: |
| C | 55  | 76  | 10    | 5      | 2,001 | 7   | 1   | 313 | 252   | 64  | 4   |     | 31  | 1  | 6   | 8   | 7   | 917 | 830   |       | 4    |

|   | *   | -   | ?  | A     | C     | D            | E            | F            | G            | H            | I            | K            | L             | M         | N            | P             | Q            | R            | S             | T             | V          |
|---|-----|-----|----|-------|-------|--------------|--------------|--------------|--------------|--------------|--------------|--------------|---------------|-----------|--------------|---------------|--------------|--------------|---------------|---------------|------------|
| D | 6   | 343 | 18 | 355   | 17    | <b>5,148</b> | 2,174        | 6            | 1,291        | 501          | 15           | 39           | 6             | 3         | 2,037        | 4             | 6            | 20           | 48            | 16            | 21         |
| E | 185 | 412 | 19 | 547   |       | 2,131        | <b>4,238</b> | 4            | 1,402        | 8            | 9            | 2,685        | 17            | 10        | 45           | 6             | 1,056        | 72           | 12            | 18            | 31         |
| F | 3   | 243 | 16 | 19    | 330   | 15           | 2            | <b>3,982</b> | 4            | 16           | 557          | 1            | 2,420         | 8         | 10           | 24            | 3            | 11           | 1,019         | 11            | 51         |
| G | 67  | 486 | 20 | 1,130 | 306   | 1,320        | 1,398        | 12           | <b>9,215</b> | 19           | 15           | 48           | 21            | 6         | 53           | 11            | 25           | 1,736        | 1,635         | 17            | 71         |
| H | 6   | 149 | 10 | 7     | 93    | 439          | 11           | 16           | 24           | <b>2,261</b> | 4            | 13           | 326           | 2         | 501          | 239           | 1,012        | 1,355        | 25            | 6             |            |
| I | 2   | 219 | 19 | 48    | 1     | 12           | 8            | 514          | 11           | 8            | <b>5,780</b> | 219          | 1,018         | 1,526     | 416          | 11            | 10           | 194          | 391           | 1,800         | 3,31       |
| K | 127 | 407 | 28 | 28    | 1     | 28           | 2,429        | 1            | 43           | 13           | 245          | <b>4,214</b> | 12            | 325       | 1,751        | 2             | 841          | 2,061        | 36            | 630           |            |
| L | 147 | 445 | 45 | 40    | 22    | 5            | 22           | 2,446        | 18           | 318          | 1,020        | 18           | <b>18,108</b> | 712       | 9            | 1,814         | 446          | 471          | 1,669         | 36            | 1,91       |
| M | 2   | 115 | 9  | 12    | 1     | 5            | 10           | 12           | 6            | 1            | 1,713        | 349          | 712           | <b>65</b> | 25           | 1             | 3            | 206          | 16            | 927           | 91         |
| N | 5   | 244 | 18 | 16    | 14    | 2,061        | 47           | 14           | 42           | 508          | 419          | 1,715        | 6             | 6         | <b>4,248</b> | 5             | 22           | 48           | 1,955         | 596           |            |
| P | 9   | 390 | 25 | 822   | 6     | 3            | 7            | 17           | 6            | 269          | 13           | 9            | 1,857         | 2         | 5            | <b>10,285</b> | 419          | 528          | 1,939         | 580           |            |
| Q | 405 | 195 | 16 | 13    | 2     | 13           | 1,007        |              | 27           | 1,040        | 8            | 841          | 420           | 2         | 8            | 427           | <b>3,216</b> | 1,931        | 21            | 10            |            |
| R | 297 | 246 | 24 | 23    | 1,036 | 24           | 40           | 10           | 1,689        | 1,498        | 217          | 2,028        | 512           | 154       | 35           | 495           | 2,010        | <b>6,533</b> | 979           | 422           |            |
| S | 181 | 547 | 34 | 1,347 | 935   | 46           | 12           | 1,089        | 1,699        | 33           | 448          | 52           | 1,770         | 16        | 1,932        | 1,932         | 8            | 1,007        | <b>13,924</b> | 1,603         |            |
| T | 2   | 293 | 16 | 3,134 | 5     | 16           | 26           | 14           | 32           | 7            | 1,861        | 609          | 35            | 907       | 660          | 623           | 8            | 449          | 1,606         | <b>10,020</b> |            |
| V | 3   | 269 | 24 | 3,102 | 9     | 279          | 366          | 662          | 707          | 5            | 3,335        | 15           | 1,971         | 904       | 8            | 19            | 5            | 19           | 42            | 72            | <b>8,8</b> |
| W | 269 | 48  | 2  |       | 207   | 1            | 3            | 8            | 98           | 1            |              | 1            | 198           | 6         |              | 2             | 39           | 505          | 110           |               |            |
| Y | 192 | 130 | 19 | 1     | 859   | 411          | 11           | 653          | 7            | 1,077        | 7            | 10           | 38            |           | 431          | 11            | 10           | 24           | 412           | 5             |            |

Variants by chromosome

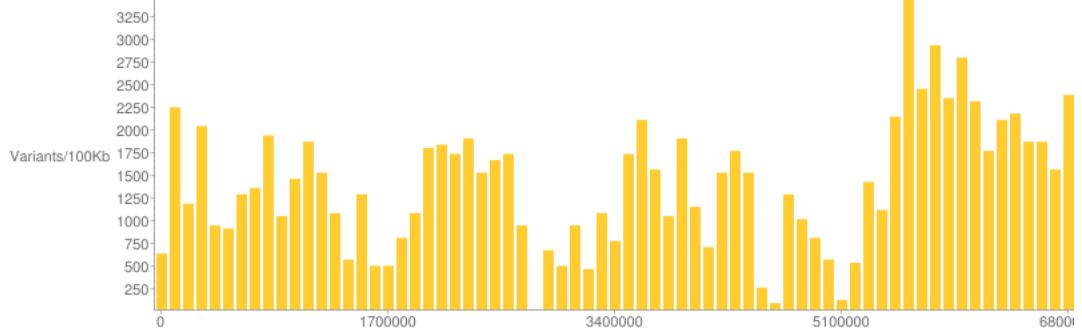

1, Position,0,100000,200000,300000,400000,500000,600000,700000,800000,900000,1000000,1100000,1200000,1300000,1400000,1500000,1600000  
 1, Count,667,2268,1211,2046,951,920,1290,1374,1943,1054,1474,1898,1538,1110,576,1288,524,506,823,1102,1825,1860,1759,1914,1542,1676,1737,973,20,700,5

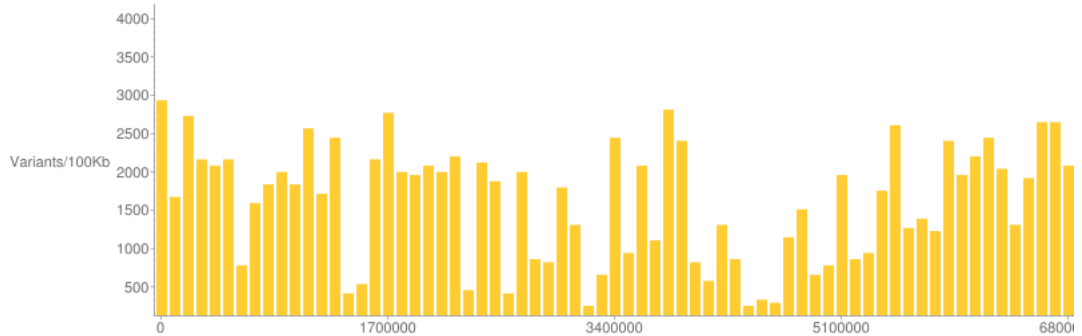

2, Position,0,100000,200000,300000,400000,500000,600000,700000,800000,900000,1000000,1100000,1200000,1300000,1400000,1500000,1600000  
 2, Count,2958,1695,2761,2161,2099,2194,775,1612,1831,2003,1870,2581,1747,2462,436,567,2168,2770,2024,1978,2083,2002,2198,487,2117,1871,415,1996,868,8

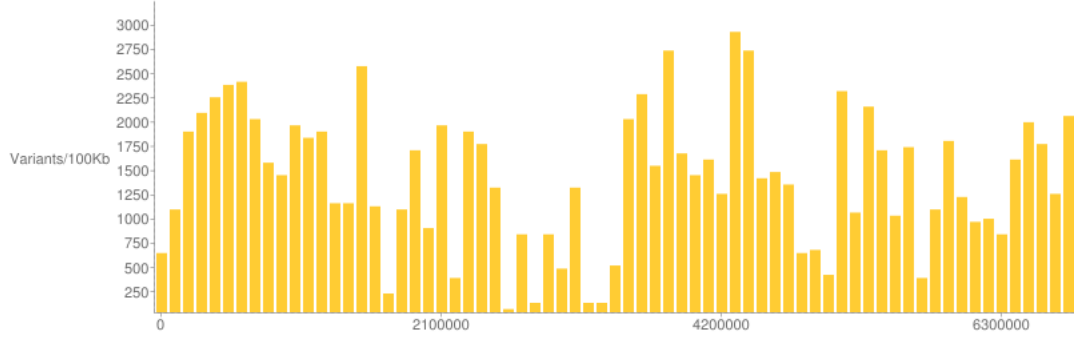

3, Position,0,100000,200000,300000,400000,500000,600000,700000,800000,900000,1000000,1100000,1200000,1300000,1400000,1500000,1600000  
 3,Count,652,1121,1919,2096,2273,2396,2425,2053,1578,1469,1963,1861,1906,1165,1189,2585,1148,240,1125,1704,925,1986,396,1926,1791,1326,72,866,141,867

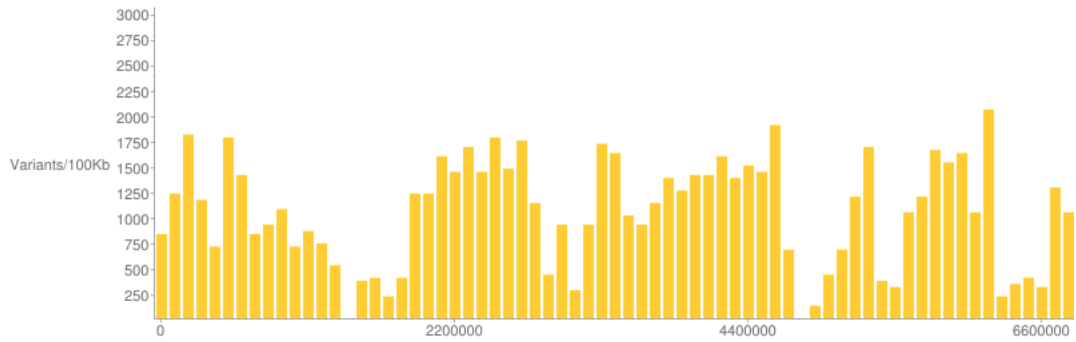

4, Position,0,100000,200000,300000,400000,500000,600000,700000,800000,900000,1000000,1100000,1200000,1300000,1400000,1500000,1600000  
 4,Count,858,1270,1834,1202,745,1794,1438,874,961,1115,747,896,781,560,45,406,434,236,437,1243,1247,1630,1481,1704,1487,1799,1498,1778,1175,476,950,3

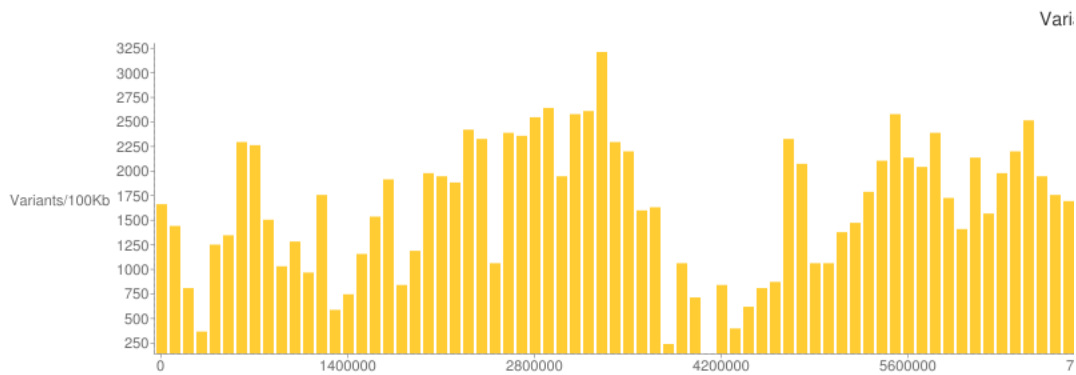

5, Position,0,100000,200000,300000,400000,500000,600000,700000,800000,900000,1000000,1100000,1200000,1300000,1400000,1500000,1600000  
 5,Count,1663,1464,832,377,1255,1350,2294,2267,1520,1041,1300,972,1782,599,767,1171,1536,1938,861,1210,1989,1949,1890,2431,2348,1068,2407,2375,2569,2



Variants histogram: 6

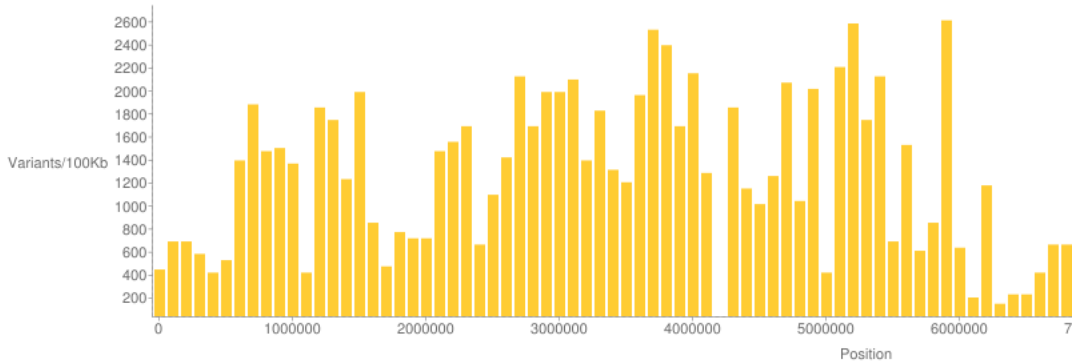

6, Position,0,100000,200000,300000,400000,500000,600000,700000,800000,900000,1000000,1100000,1200000,1300000,1400000,1500000,1600000  
 6,Count,445,714,709,583,439,537,1397,1899,1492,1511,1379,428,1869,1766,1246,2005,850,485,771,735,732,1489,1577,1705,676,1106,1442,2139,1715,2008,198

Variants histogr

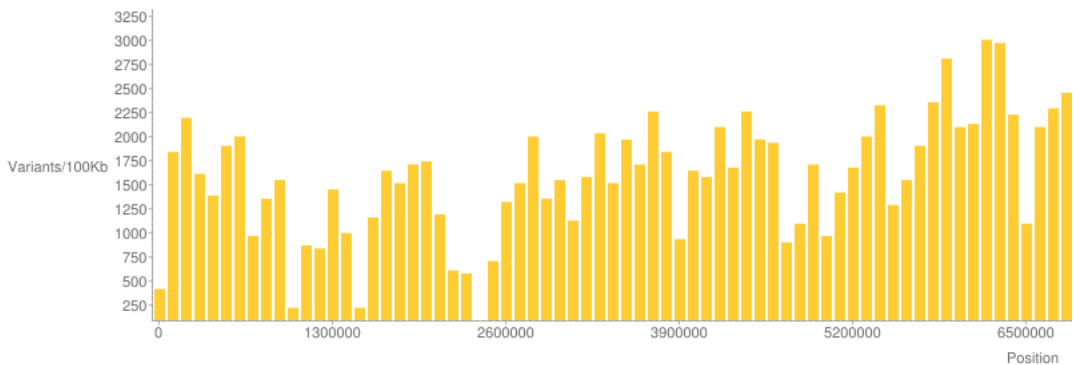

7, Position,0,100000,200000,300000,400000,500000,600000,700000,800000,900000,1000000,1100000,1200000,1300000,1400000,1500000,1600000  
 7,Count,424,1865,2210,1630,1408,1912,2002,975,1380,1574,221,883,857,1451,1005,247,1183,1647,1532,1726,1748,1196,627,592,90,709,1336,1541,2020,1356,1

Va

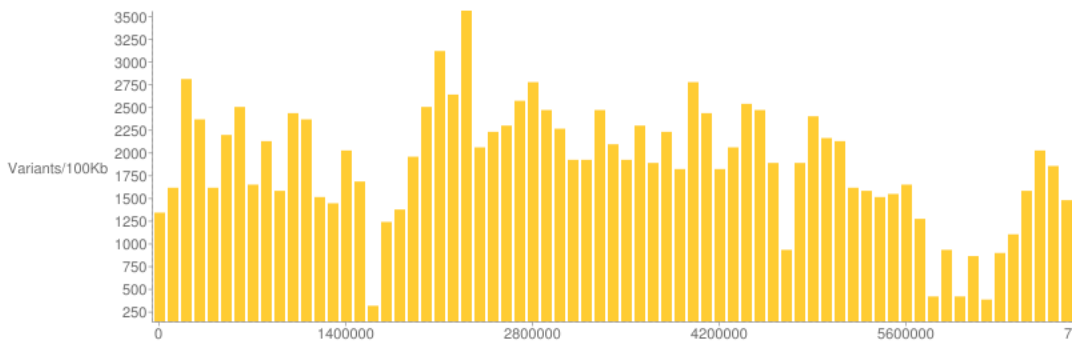

8, Position,0,100000,200000,300000,400000,500000,600000,700000,800000,900000,1000000,1100000,1200000,1300000,1400000,1500000,1600000  
 8,Count,1367,1619,2841,2381,1625,2195,2533,1678,2133,1600,2459,2367,1514,1447,2024,1706,314,1265,1405,1961,2515,3145,2647,3561,2074,2245,2320,2588,2

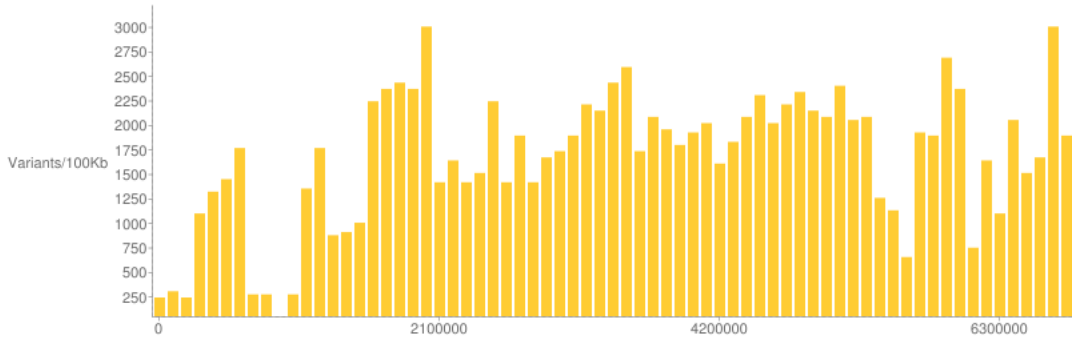

9, Position,0,100000,200000,300000,400000,500000,600000,700000,800000,900000,1000000,1100000,1200000,1300000,1400000,1500000,1600000,1700000,1800000,1900000,2000000,2100000,2200000,2300000,2400000,2500000,2600000,2700000,2800000,2900000,3000000,3100000,3200000,3300000,3400000,3500000,3600000,3700000,3800000,3900000,4000000,4100000,4200000,4300000,4400000,4500000,4600000,4700000,4800000,4900000,5000000,5100000,5200000,5300000,5400000,5500000,5600000,5700000,5800000,5900000,6000000,6100000,6200000,6300000, Count,244,317,256,1111,1322,1476,1788,302,295,77,283,1378,1775,899,934,1030,2243,2371,2435,2385,3022,1436,1663,1438,1533,2267,1420,1914,1424,1686,

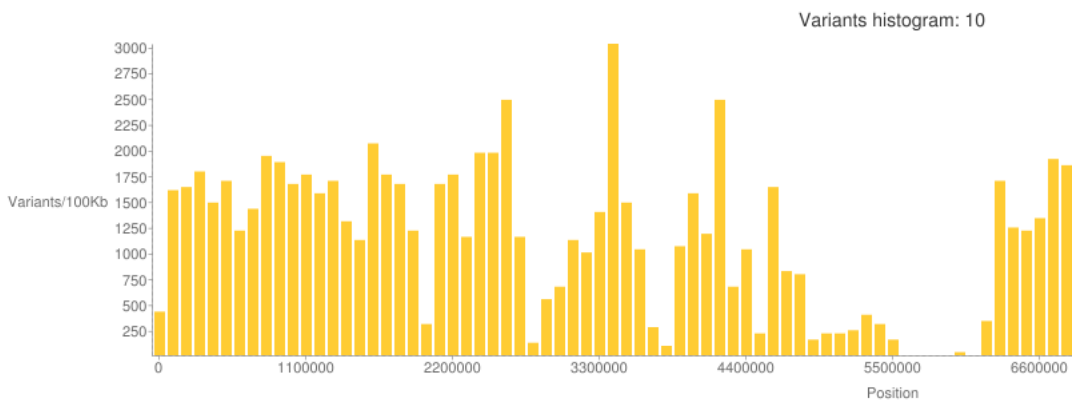

10, Position,0,100000,200000,300000,400000,500000,600000,700000,800000,900000,1000000,1100000,1200000,1300000,1400000,1500000,1600000,1700000,1800000,1900000,2000000,2100000,2200000,2300000,2400000,2500000,2600000,2700000,2800000,2900000,3000000,3100000,3200000,3300000,3400000,3500000,3600000,3700000,3800000,3900000,4000000,4100000,4200000,4300000,4400000,4500000,4600000,4700000,4800000,4900000,5000000,5100000,5200000,5300000,5400000,5500000,5600000,5700000,5800000,5900000,6000000,6100000,6200000,6300000,6400000,6500000,6600000, Count,440,1630,1673,1805,1499,1718,1237,1447,1962,1916,1691,1768,1586,1707,1329,1155,2089,1790,1698,1224,324,1682,1793,1175,1980,1989,2521,1180,1

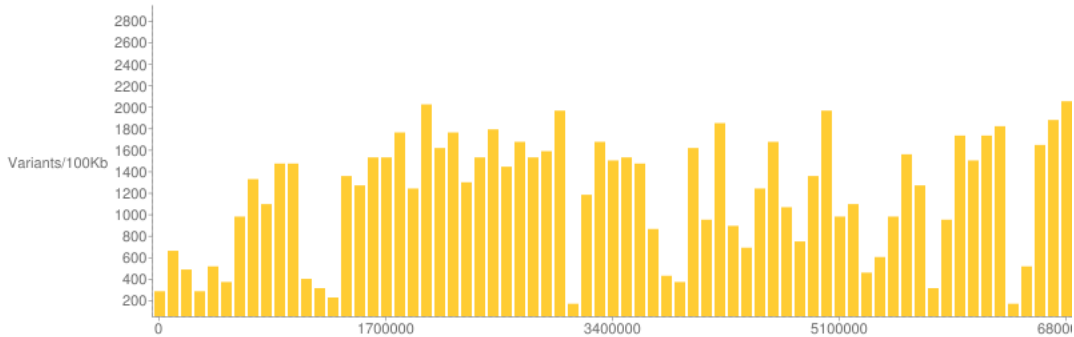

11, Position,0,100000,200000,300000,400000,500000,600000,700000,800000,900000,1000000,1100000,1200000,1300000,1400000,1500000,1600000,1700000,1800000,1900000,2000000,2100000,2200000,2300000,2400000,2500000,2600000,2700000,2800000,2900000,3000000,3100000,3200000,3300000,3400000,3500000,3600000,3700000,3800000,3900000,4000000,4100000,4200000,4300000,4400000,4500000,4600000,4700000,4800000,4900000,5000000,5100000,5200000,5300000,5400000,5500000,5600000,5700000,5800000,5900000,6000000,6100000,6200000,6300000,6400000,6500000,6600000,6700000,6800000, Count,302,672,496,307,514,383,989,1337,1093,1475,1486,422,320,238,1370,1294,1551,1548,1766,1243,2044,1621,1778,1296,1546,1814,1463,1689,1546,1586,

Varian

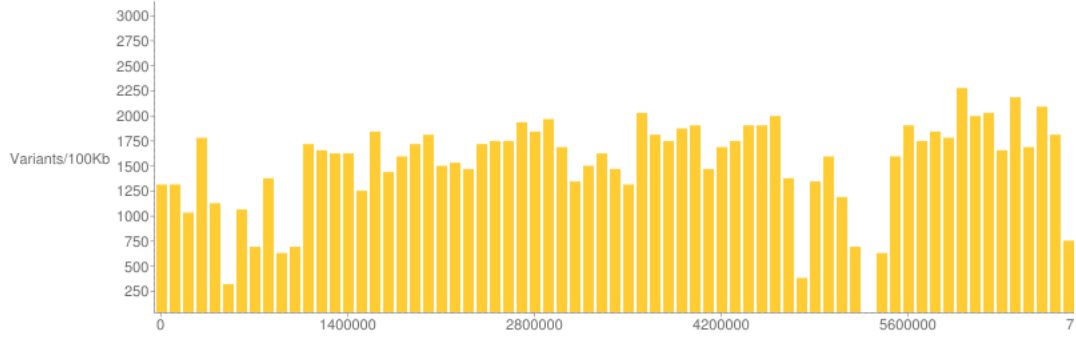

12, Position,0,100000,200000,300000,400000,500000,600000,700000,800000,900000,1000000,1100000,1200000,1300000,1400000,1500000,1600000  
 12, Count,1330,1309,1034,1780,1124,334,1091,689,1388,641,707,1738,1653,1646,1626,1272,1855,1461,1616,1726,1810,1499,1532,1467,1740,1761,1764,1936,185

\

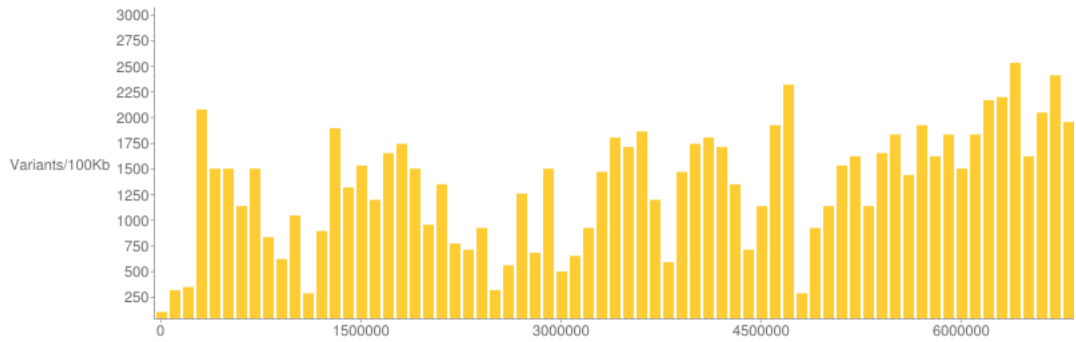

13, Position,0,100000,200000,300000,400000,500000,600000,700000,800000,900000,1000000,1100000,1200000,1300000,1400000,1500000,1600000  
 13, Count,122,324,361,2103,1499,1520,1138,1507,853,622,1060,296,907,1917,1333,1550,1196,1660,1765,1514,952,1373,787,734,938,319,571,1281,678,1506,524

Variants histoc

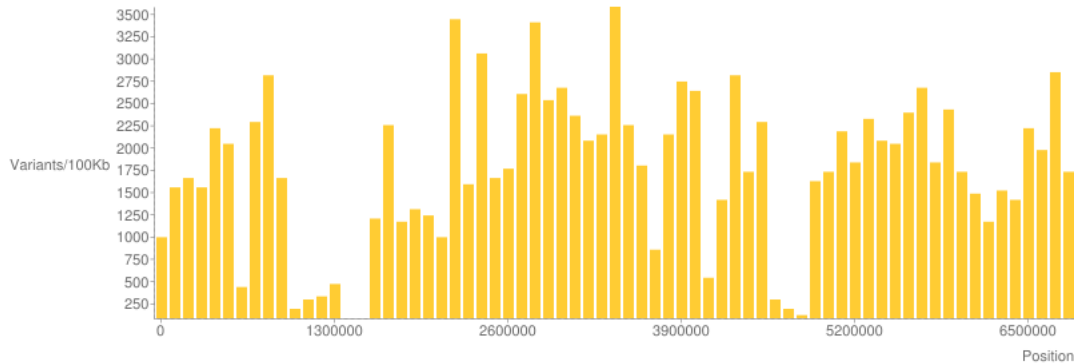

14, Position,0,100000,200000,300000,400000,500000,600000,700000,800000,900000,1000000,1100000,1200000,1300000,1400000,1500000,1600000  
 14, Count,1015,1580,1667,1551,2217,2051,459,2308,2837,1658,193,295,326,472,106,115,1210,2258,1176,1322,1258,1016,3459,1603,3090,1686,1789,2634,3435,2

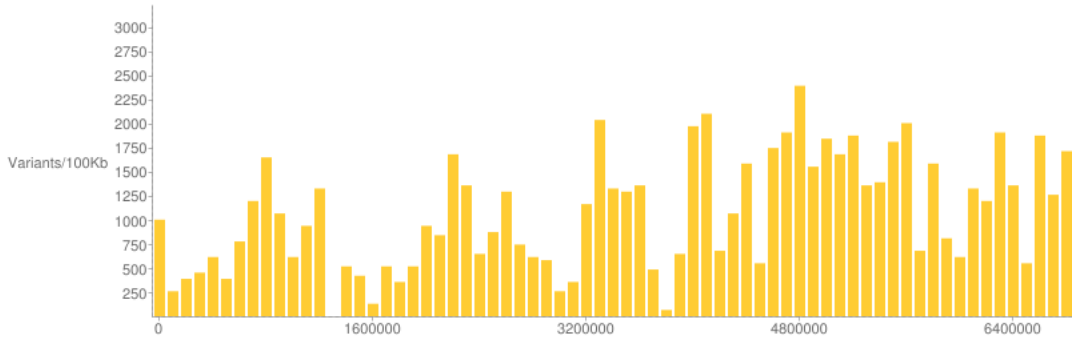

15, Position,0,100000,200000,300000,400000,500000,600000,700000,800000,900000,1000000,1100000,1200000,1300000,1400000,1500000,1600000  
15, Count,1027,293,392,471,644,419,783,1201,1657,1093,643,942,1345,3,544,428,138,543,387,551,960,868,1686,1381,650,900,1304,774,627,614,281,374,1192,

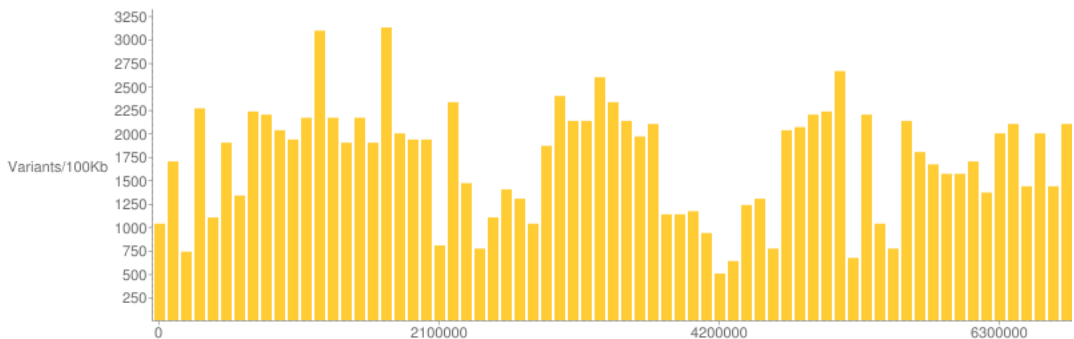

16, Position,0,100000,200000,300000,400000,500000,600000,700000,800000,900000,1000000,1100000,1200000,1300000,1400000,1500000,1600000  
16, Count,1056,1702,769,2274,1117,1904,1357,2242,2204,2035,1964,2175,3114,2194,1901,2195,1918,3156,2018,1959,1937,837,2353,1498,783,1116,1434,1306,10

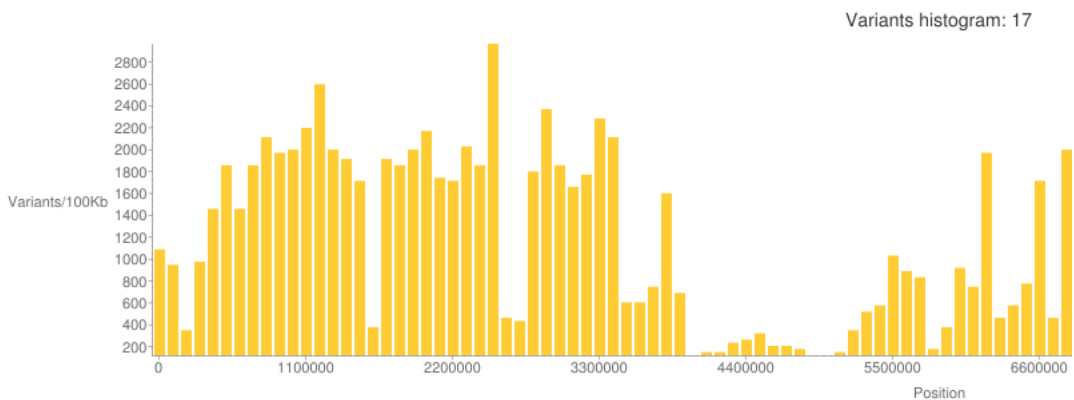

17, Position,0,100000,200000,300000,400000,500000,600000,700000,800000,900000,1000000,1100000,1200000,1300000,1400000,1500000,1600000  
17, Count,1088,963,347,982,1467,1866,1464,1856,2118,1971,2002,2215,2595,2009,1929,1731,388,1937,1872,2018,2174,1753,1736,2041,1864,2962,481,481,1797,

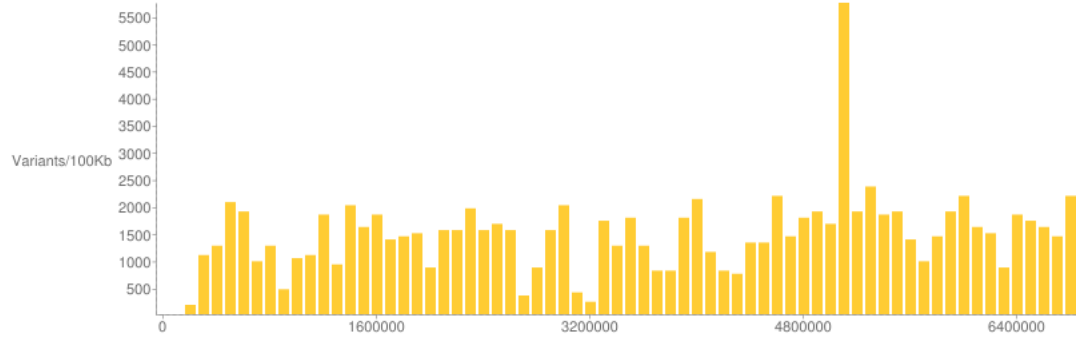

18, Position,0,100000,200000,300000,400000,500000,600000,700000,800000,900000,1000000,1100000,1200000,1300000,1400000,1500000,1600000  
 18, Count,26,32,210,1157,1310,2096,1971,1058,1329,525,1082,1118,1896,1000,2038,1666,1885,1405,1495,1522,906,1631,1616,1994,1587,1724,1605,409,938,161

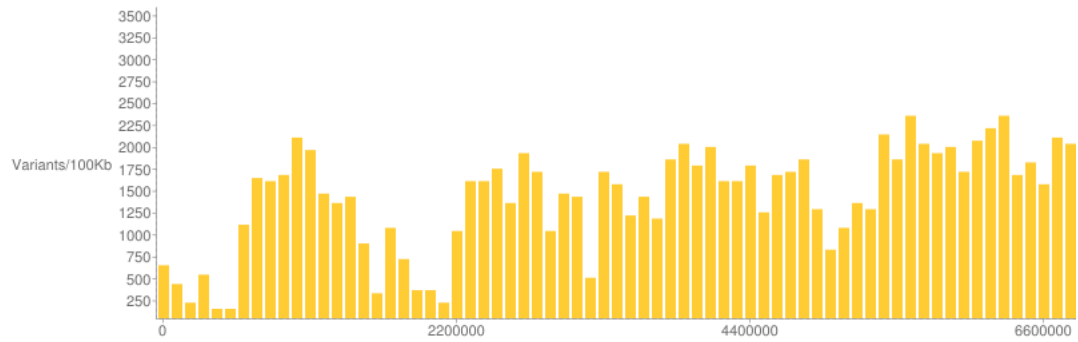

19, Position,0,100000,200000,300000,400000,500000,600000,700000,800000,900000,1000000,1100000,1200000,1300000,1400000,1500000,1600000  
 19, Count,659,453,227,575,184,181,1145,1656,1635,1684,2119,1964,1500,1361,1463,921,341,1085,736,383,390,255,1063,1620,1628,1783,1390,1949,1722,1069,1

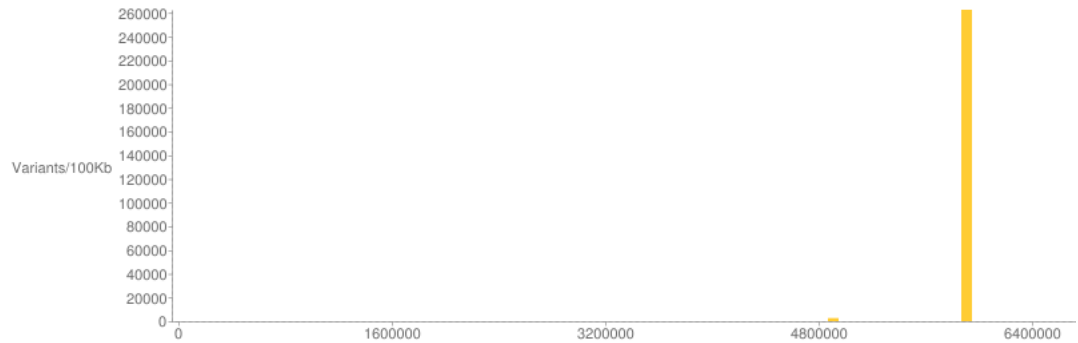

20, Position,0,100000,200000,300000,400000,500000,600000,700000,800000,900000,1000000,1100000,1200000,1300000,1400000,1500000,1600000  
 20, Count,13,1420,108,666,1301,357,888,1702,397,1978,1629,869,626,2212,1802,970,223,391,1942,1594,1521,1699,1481,1781,1354,860,6,57,145,711,2332,2332

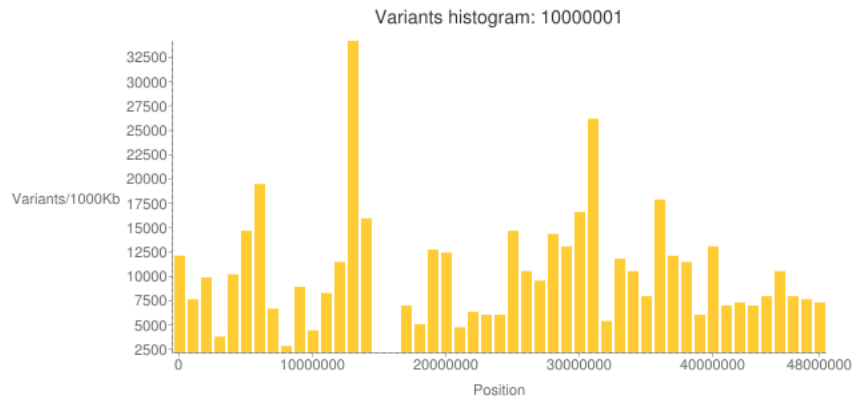

10000001, Position,0,1000000,2000000,3000000,4000000,5000000,6000000,7000000,8000000,9000000,10000000,11000000,12000000,13000000,14000000,15000000,16000000,17000000,18000000,19000000,20000000,21000000,22000000,23000000,24000000,25000000,26000000,27000000,28000000,29000000,30000000,31000000,32000000,33000000,34000000,35000000,36000000,37000000,38000000,39000000,40000000,41000000,42000000,43000000,44000000,45000000,46000000,47000000,48000000,Count,12374,7753,9922,4001,10389,14734,19488,6680,2819,9073,4547,8303,11689,34154,16178,2131,2350,6973,5200,12938,12571,4773,6473,6113,6212

**Details by gene**

[Here](#) you can find a tab-separated table.
