# Supplementary material for: The ‘Tommy Atkins’ mango genome reveals candidate genes for fruit quality
Source: PubMed Central journal article supplement (PMC7898432; doi:10.1186/s12870-021-02858-1), 2021-02-22
Supplement: 12870_2021_2858_MOESM2_ESM.pdf [file 12870_2021_2858_MOESM2_ESM.pdf]

## SnpEff: Variant analysis

### Contents

[Summary](#)  
[Variant rate by chromosome](#)  
[Variants by type](#)  
[Number of variants by impact](#)  
[Number of variants by functional class](#)  
[Number of variants by effect](#)  
[Quality histogram](#)  
[InDel length histogram](#)  
[Base variant table](#)  
[Transition vs transversions \(ts/tv\)](#)  
[Allele frequency](#)  
[Allele Count](#)  
[Codon change table](#)  
[Amino acid change table](#)  
[Chromosome variants plots](#)  
[Details by gene](#)

### Summary

|                                                                          |                                                          |
|--------------------------------------------------------------------------|----------------------------------------------------------|
| <b>Genome</b>                                                            | TA4                                                      |
| <b>Date</b>                                                              | 2018-01-01 19:47                                         |
| <b>SnpEff version</b>                                                    | SnpEff 4.3p (build 2017-06-06 09:55), by Pablo Cingolani |
| <b>Command line arguments</b>                                            | SnpEff TA4 kp_all.vcf                                    |
| <b>Warnings</b>                                                          | 201,439                                                  |
| <b>Errors</b>                                                            | 0                                                        |
| <b>Number of lines (input file)</b>                                      | 7,791,116                                                |
| <b>Number of variants (before filter)</b>                                | 9,030,162                                                |
| <b>Number of not variants (i.e. reference equals alternative)</b>        | 0                                                        |
| <b>Number of variants processed (i.e. after filter and non-variants)</b> | 9,030,142                                                |
| <b>Number of known variants (i.e. non-empty ID)</b>                      | 0 ( 0% )                                                 |
| <b>Number of multi-allelic VCF entries (i.e. more than two alleles)</b>  | 450,364                                                  |
| <b>Number of effects</b>                                                 | 17,539,335                                               |
| <b>Genome total length</b>                                               | 377,290,333                                              |
| <b>Genome effective length</b>                                           | 377,290,333                                              |
| <b>Variant rate</b>                                                      | 1 variant every 41 bases                                 |

### Variants rate details

| Chromosome   | Length             | Variants         | Variants rate |
|--------------|--------------------|------------------|---------------|
| 1            | 17,320,008         | 466,510          | 37            |
| 2            | 17,063,873         | 428,844          | 39            |
| 3            | 21,566,805         | 530,741          | 40            |
| 4            | 22,357,487         | 484,241          | 46            |
| 5            | 14,540,018         | 324,800          | 44            |
| 6            | 10,680,009         | 206,656          | 51            |
| 7            | 13,133,232         | 361,416          | 36            |
| 8            | 14,750,018         | 356,138          | 41            |
| 9            | 21,055,410         | 481,402          | 43            |
| 10           | 11,063,414         | 222,749          | 49            |
| 11           | 17,675,019         | 690,820          | 25            |
| 12           | 14,336,529         | 310,197          | 46            |
| 13           | 15,099,493         | 357,215          | 42            |
| 14           | 13,335,999         | 328,449          | 40            |
| 15           | 16,178,320         | 329,319          | 49            |
| 16           | 21,434,198         | 430,451          | 49            |
| 17           | 11,746,059         | 324,153          | 36            |
| 18           | 16,863,820         | 401,989          | 41            |
| 19           | 22,398,858         | 800,148          | 27            |
| 20           | 16,105,987         | 621,593          | 25            |
| 10000001     | 48,585,777         | 572,311          | 84            |
| <b>Total</b> | <b>377,290,333</b> | <b>9,030,142</b> | <b>41</b>     |

### Number variants by type

| Type         | Total            |
|--------------|------------------|
| <b>SNP</b>   | 6,291,666        |
| <b>MNP</b>   | 1,568,959        |
| <b>Total</b> | <b>9,030,142</b> |

| Type         | Total            |
|--------------|------------------|
| INS          | 223,249          |
| DEL          | 245,632          |
| MIXED        | 700,636          |
| INV          | 0                |
| DUP          | 0                |
| BND          | 0                |
| INTERVAL     | 0                |
| <b>Total</b> | <b>9,030,142</b> |

Number of effects by impact

| Type (alphabetical order) | Count      | Percent |
|---------------------------|------------|---------|
| HIGH                      | 13,392     | 0.076%  |
| LOW                       | 203,108    | 1.158%  |
| MODERATE                  | 235,851    | 1.345%  |
| MODIFIER                  | 17,086,984 | 97.421% |

Number of effects by functional class

| Type (alphabetical order) | Count   | Percent |
|---------------------------|---------|---------|
| MISSENSE                  | 201,746 | 55.063% |
| NONSENSE                  | 2,688   | 0.734%  |
| SILENT                    | 161,956 | 44.203% |

Missense / Silent ratio: 1.2457

Number of effects by type and region

| Type                                           |           |         | Region                    |           |         |
|------------------------------------------------|-----------|---------|---------------------------|-----------|---------|
| Type (alphabetical order)                      | Count     | Percent | Type (alphabetical order) | Count     | Percent |
| 3_prime_UTR_variant                            | 110,313   | 0.627%  | DOWNSTREAM                | 4,136,532 | 23.584% |
| 5_prime_UTR_premature_start_codon_gain_variant | 7,617     | 0.043%  | EXON                      | 408,289   | 2.328%  |
| 5_prime_UTR_truncation                         | 1         | 0%      | GENE                      | 2         | 0%      |
| 5_prime_UTR_variant                            | 65,666    | 0.373%  | INTERGENIC                | 7,001,925 | 39.921% |
| bidirectional_gene_fusion                      | 2         | 0%      | INTRON                    | 1,694,663 | 9.662%  |
| conservative_inframe_deletion                  | 1,268     | 0.007%  | SPLICE_SITE_ACCEPTOR      | 1,965     | 0.011%  |
| conservative_inframe_insertion                 | 1,127     | 0.006%  | SPLICE_SITE_DONOR         | 1,920     | 0.011%  |
| disruptive_inframe_deletion                    | 878       | 0.005%  | SPLICE_SITE_REGION        | 32,557    | 0.186%  |
| disruptive_inframe_insertion                   | 560       | 0.003%  | TRANSCRIPT                | 1,059     | 0.006%  |
| downstream_gene_variant                        | 4,136,549 | 23.526% | UPSTREAM                  | 4,076,994 | 23.245% |
| exon_loss_variant                              | 3         | 0%      | UTR_3_PRIME               | 110,222   | 0.628%  |
| frameshift_variant                             | 5,015     | 0.029%  | UTR_5_PRIME               | 73,207    | 0.417%  |
| initiator_codon_variant                        | 73        | 0%      |                           |           |         |
| intergenic_region                              | 7,001,925 | 39.822% |                           |           |         |
| intragenic_variant                             | 284       | 0.002%  |                           |           |         |
| intron_variant                                 | 1,725,408 | 9.813%  |                           |           |         |
| missense_variant                               | 233,638   | 1.329%  |                           |           |         |
| non_coding_transcript_variant                  | 775       | 0.004%  |                           |           |         |
| splice_acceptor_variant                        | 2,024     | 0.012%  |                           |           |         |
| splice_donor_variant                           | 2,005     | 0.011%  |                           |           |         |
| splice_region_variant                          | 39,208    | 0.223%  |                           |           |         |
| start_lost                                     | 572       | 0.003%  |                           |           |         |
| stop_gained                                    | 3,519     | 0.02%   |                           |           |         |
| stop_lost                                      | 758       | 0.004%  |                           |           |         |
| stop_retained_variant                          | 317       | 0.002%  |                           |           |         |
| synonymous_variant                             | 166,397   | 0.946%  |                           |           |         |
| upstream_gene_variant                          | 4,076,994 | 23.187% |                           |           |         |

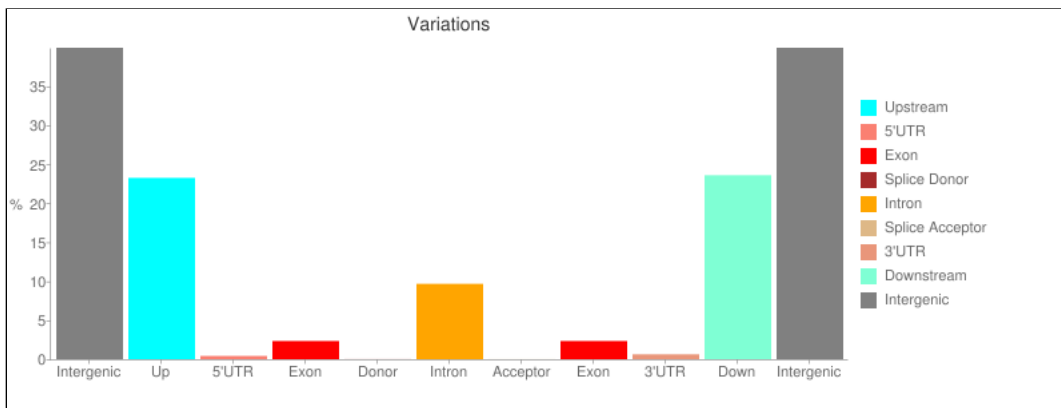

Quality:

|                    |                                                                                                                                                      |
|--------------------|------------------------------------------------------------------------------------------------------------------------------------------------------|
| Min                | 0                                                                                                                                                    |
| Max                | 6,264,490                                                                                                                                            |
| Mean               | 5,818,445                                                                                                                                            |
| Median             | 4,225                                                                                                                                                |
| Standard deviation | 49,780.119                                                                                                                                           |
| Values             | 0,1,2,3,4,5,6,7,8,9,10,11,12,13,14,15,16,17,18,19,20,21,22,23,24,25,26,27,28,29,30,31,32,33,34,35,36,37,38,39,40,41,42,43,44,45,46,47,48,49,50,51,52 |
| Count              | 25489,3136,2077,1860,1498,1297,1280,1274,1204,1139,1063,1191,1076,1151,1025,1046,1109,1053,1093,1065,1127,1096,1091,1073,1092,1182,1071              |

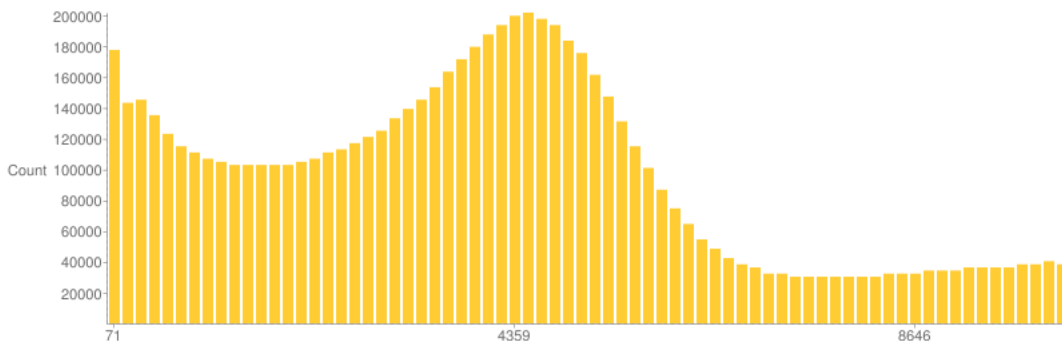

Insertions and deletions length:

|                    |                                                                                                                                          |
|--------------------|------------------------------------------------------------------------------------------------------------------------------------------|
| Min                | 0                                                                                                                                        |
| Max                | 34                                                                                                                                       |
| Mean               | 1.467                                                                                                                                    |
| Median             | 1                                                                                                                                        |
| Standard deviation | 2.71                                                                                                                                     |
| Values             | 0,1,2,3,4,5,6,7,8,9,10,11,12,13,14,15,16,17,18,19,20,21,22,23,24,25,26,27,28,29,30,31,32,34                                              |
| Count              | 129104,275837,14654,10044,5974,5428,3173,3676,3183,3229,2504,2784,1787,1435,1207,993,710,698,508,457,387,267,218,166,132,102,76,57,30,33 |

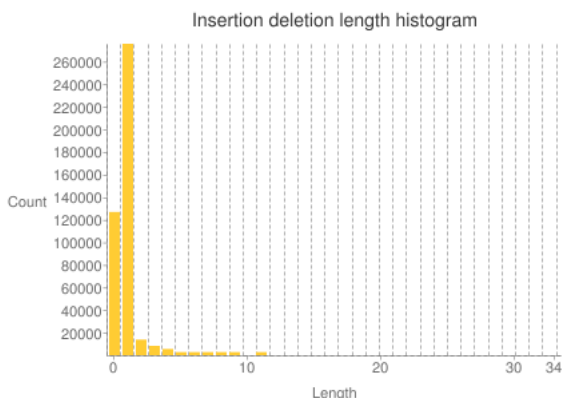

Base changes (SNPs)

|  |   |   |   |   |
|--|---|---|---|---|
|  | A | C | G | T |
|--|---|---|---|---|

|          |           |           |           |           |
|----------|-----------|-----------|-----------|-----------|
| <b>A</b> | 0         | 222,604   | 1,077,667 | 312,402   |
| <b>C</b> | 227,322   | 0         | 152,618   | 1,151,534 |
| <b>G</b> | 1,151,752 | 152,831   | 0         | 227,746   |
| <b>T</b> | 311,943   | 1,080,437 | 222,810   | 0         |

**Ts/Tv (transitions / transversions)**

**Note:** Only SNPs are used for this statistic.

**Note:** This Ts/Tv ratio is a 'raw' ratio (ratio of observed events).

|                      |           |
|----------------------|-----------|
| <b>Transitions</b>   | 5,388,710 |
| <b>Transversions</b> | 2,200,036 |
| <b>Ts/Tv ratio</b>   | 2.4494    |

**All variants:**

Sample , unknown, Total  
 Transitions ,5388710,5388710  
 Transversions ,2200036,2200036  
 Ts/Tv ,2.449,2.449

**Only known variants** (i.e. the ones having a non-empty ID field):

No results available (empty input?)

**Allele frequency**

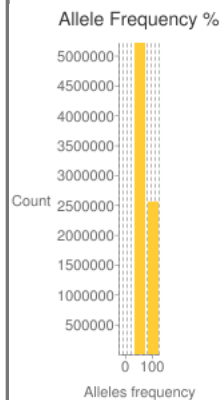

|                           |                    |
|---------------------------|--------------------|
| <b>Min</b>                | 0                  |
| <b>Max</b>                | 100                |
| <b>Mean</b>               | 66.544             |
| <b>Median</b>             | 50                 |
| <b>Standard deviation</b> | 23.527             |
| <b>Values</b>             | 0,50,100           |
| <b>Count</b>              | 17,5213172,2577927 |

**Allele Count**

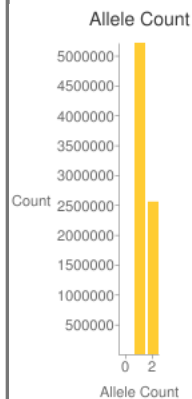

|                           |                    |
|---------------------------|--------------------|
| <b>Min</b>                | 0                  |
| <b>Max</b>                | 2                  |
| <b>Mean</b>               | 1.331              |
| <b>Median</b>             | 1                  |
| <b>Standard deviation</b> | 0.471              |
| <b>Values</b>             | 0,1,2              |
| <b>Count</b>              | 17,5213172,2577927 |

**Hom/Het per sample**

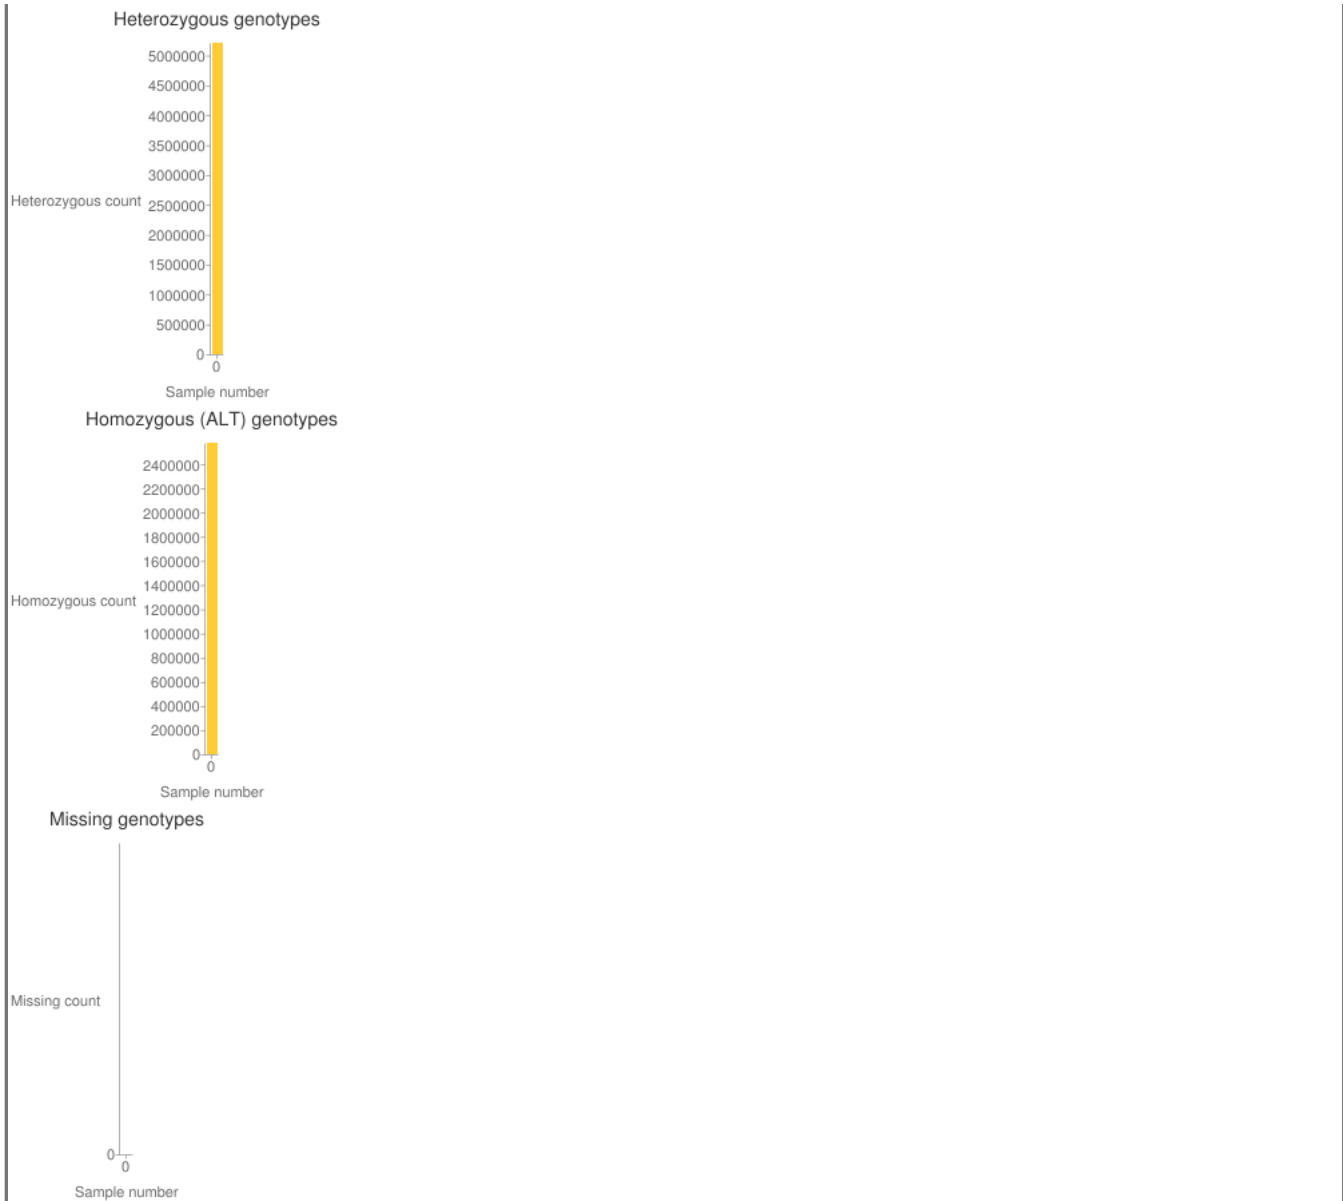

Sample\_names , unknown  
 Reference , 17  
 Het , 5213172  
 Hom , 2577927  
 Missing , 0

**Codon changes**

How to read this table:

- Rows are reference codons and columns are changed codons. E.g. Row 'AAA' column 'TAA' indicates how many 'AAA' codons have been replaced by 'TAA' codons.
- Red background colors indicate that more changes happened (heat-map).
- Diagonals are indicated using grey background color
- WARNING: This table may include different translation codon tables (e.g. mamalian DNA and mitochondrial DNA).

|     | -   | AAA        | AAC       | AAG        | AAT        | ACA       | ACC       | ACG       | ACT       | AGA        | AGC       | AGG       | AGT   | ATA   | ATC | ATG   | ATT   | CAA | CAC | CAG | CAT |
|-----|-----|------------|-----------|------------|------------|-----------|-----------|-----------|-----------|------------|-----------|-----------|-------|-------|-----|-------|-------|-----|-----|-----|-----|
| -   |     | 119        | 73        | 121        | 129        | 75        | 55        | 24        | 92        | 69         | 52        | 62        | 83    | 41    | 37  | 67    | 71    | 118 | 66  | 111 | 113 |
| AAA | 357 | <b>184</b> | 575       | 3,011      | 796        | 559       | 6         | 11        | 6         | 1,580      | 11        | 29        | 17    | 355   | 5   | 18    | 13    | 797 | 5   | 15  | 6   |
| AAC | 193 | 655        | <b>96</b> | 618        | 3,037      | 7         | 312       | 3         | 17        | 9          | 1,241     | 7         | 30    | 4     | 184 | 3     | 3     | 15  | 212 | 7   | 7   |
| AAG | 311 | 3,088      | 660       | <b>140</b> | 787        | 23        | 6         | 382       | 11        | 29         | 17        | 1,577     | 4     | 8     | 7   | 545   | 8     | 18  | 6   | 548 | 4   |
| AAT | 271 | 820        | 3,046     | 640        | <b>155</b> | 10        | 9         | 6         | 579       | 12         | 39        | 16        | 1,764 | 6     | 16  | 8     | 488   | 14  | 7   | 4   | 527 |
| ACA | 151 | 562        | 12        | 14         | 11         | <b>88</b> | 593       | 2,351     | 915       | 472        | 7         | 7         | 9     | 1,102 | 12  | 115   | 10    | 10  |     |     | 1   |
| ACC | 106 | 2          | 391       | 6          | 4          | 530       | <b>41</b> | 440       | 2,363     | 1          | 411       | 3         | 12    | 11    | 529 | 10    | 24    |     | 2   |     |     |
| ACG | 45  | 11         | 5         | 368        | 7          | 2,329     | 422       | <b>17</b> | 579       | 7          | 2         | 201       | 4     | 32    | 6   | 1,298 | 14    |     |     | 3   | 2   |
| ACT | 155 | 14         | 19        | 5          | 601        | 987       | 2,610     | 642       | <b>87</b> | 6          | 10        | 4         | 777   | 11    | 19  | 23    | 1,307 |     | 3   | 3   | 6   |
| AGA | 170 | 1,540      | 4         | 44         | 18         | 432       |           | 10        | 5         | <b>100</b> | 265       | 1,506     | 262   | 317   | 3   | 5     | 5     | 20  | 1   | 2   |     |
| AGC | 86  | 21         | 1,168     | 16         | 27         | 8         | 380       | 4         | 16        | 254        | <b>84</b> | 218       | 1,882 | 4     | 180 | 1     | 12    |     | 6   | 1   | 1   |
| AGG | 111 | 25         | 2         | 1,493      | 18         | 7         | 3         | 255       | 4         | 1,570      | 274       | <b>57</b> | 328   | 4     | 1   | 265   | 3     |     |     | 22  | 1   |

|     | -   | AAA   | AAC   | AAG   | AAT   | ACA   | ACC   | ACG   | ACT   | AGA   | AGC   | AGG | AGT   | ATA   | ATC   | ATG   | ATT   | CAA   | CAC   | CAG   | CAT   |
|-----|-----|-------|-------|-------|-------|-------|-------|-------|-------|-------|-------|-----|-------|-------|-------|-------|-------|-------|-------|-------|-------|
| AGT | 167 | 12    | 30    | 22    | 1,764 | 8     | 13    | 3     | 743   | 301   | 1,843 | 282 | 95    | 4     | 7     | 7     | 446   | 2     |       |       | 25    |
| ATA | 112 | 337   | 2     | 14    | 15    | 969   | 7     | 20    | 11    | 285   | 4     | 4   | 9     | 68    | 663   | 1,385 | 926   | 9     | 2     |       | 1     |
| ATC | 89  | 4     | 158   | 3     | 7     | 7     | 514   | 2     | 16    | 1     | 145   | 2   | 10    | 716   | 57    | 403   | 2,538 |       | 1     | 1     |       |
| ATG | 252 | 8     | 13    | 480   | 41    | 78    | 10    | 1,362 | 18    | 12    | 6     | 305 | 4     | 1,580 | 416   | 105   | 632   |       |       | 9     | 5     |
| ATT | 182 | 12    | 14    | 3     | 488   | 11    | 20    | 10    | 1,214 | 5     | 9     | 4   | 388   | 882   | 2,605 | 604   | 133   |       |       |       | 10    |
| CAA | 210 | 747   | 7     | 13    | 10    | 12    |       | 1     |       | 18    | 7     |     |       | 5     |       | 1     | 1     | 111   | 339   | 2,348 | 425   |
| CAC | 79  | 3     | 218   | 2     | 8     | 1     | 3     |       | 2     | 2     | 3     | 1   |       |       | 1     | 1     |       | 317   | 44    | 378   | 1,590 |
| CAG | 180 | 12    | 4     | 522   | 4     | 2     |       |       | 1     |       |       | 8   | 1     | 1     | 1     | 4     |       | 2,296 | 368   | 73    | 434   |
| CAT | 174 | 6     | 8     | 2     | 569   | 7     |       |       | 4     |       |       |     | 19    |       |       | 1     | 6     | 470   | 1,749 | 377   | 75    |
| CCA | 258 | 4     | 3     | 1     |       | 292   | 1     | 5     | 4     | 9     |       |     |       | 7     |       | 1     |       | 390   | 6     | 20    | 5     |
| CCC | 111 |       | 2     |       |       | 2     | 145   |       | 8     |       | 2     |     |       |       |       | 3     |       | 3     | 127   | 4     | 4     |
| CCG | 84  |       |       | 4     |       | 4     |       | 78    | 2     |       |       | 1   | 1     |       |       | 2     |       | 6     | 2     | 246   | 3     |
| CCT | 218 |       |       |       | 14    | 3     | 4     | 2     | 383   | 1     |       |     | 5     |       |       | 1     | 2     | 5     | 10    | 9     | 292   |
| CGA | 45  | 19    | 2     |       | 1     | 1     | 1     |       |       | 524   | 3     | 11  |       | 2     |       | 1     | 1     | 1,679 | 6     | 29    | 12    |
| CGC | 28  | 2     | 5     |       |       |       | 1     | 1     |       | 3     | 159   | 2   |       |       |       | 3     |       | 8     | 771   | 8     | 20    |
| CGG | 40  |       |       | 6     | 1     | 1     |       | 4     |       | 12    | 2     | 404 | 2     |       |       | 4     |       | 25    | 6     | 1,429 | 19    |
| CGT | 47  |       |       | 2     | 12    |       |       |       | 9     | 11    | 2     | 5   | 227   |       |       |       | 3     | 14    | 17    | 16    | 1,631 |
| CTA | 88  | 3     |       | 1     | 1     | 5     |       |       |       | 4     |       | 1   |       | 304   | 2     | 9     | 9     | 284   |       | 4     | 2     |
| CTC | 117 |       | 1     |       |       |       | 4     | 1     |       |       | 3     |     | 2     | 3     | 275   | 5     | 9     | 6     | 142   | 3     | 3     |
| CTG | 85  | 1     | 1     | 3     | 1     | 2     |       | 2     |       |       |       | 2   |       | 13    | 2     | 453   | 6     | 7     |       | 342   | 2     |
| CTT | 192 | 1     | 1     | 3     | 1     |       | 1     |       | 17    |       |       |     | 4     | 10    | 6     | 3     | 656   | 11    | 4     | 8     | 335   |
| GAA | 393 | 2,391 | 17    | 46    | 26    | 14    | 1     | 5     | 1     | 42    |       | 2   | 1     | 10    | 2     |       | 1     | 830   | 2     | 10    | 5     |
| GAC | 146 | 17    | 1,050 | 12    | 30    |       | 5     | 1     | 3     | 1     | 28    | 1   |       | 1     | 3     | 1     | 2     | 2     | 217   | 2     | 9     |
| GAG | 291 | 45    | 19    | 2,019 | 26    | 1     |       | 11    |       | 8     | 3     | 41  | 1     | 2     |       | 14    |       | 22    | 3     | 860   | 3     |
| GAT | 346 | 18    | 34    | 12    | 2,287 |       | 1     | 1     | 13    | 4     | 1     | 2   | 50    | 1     | 1     | 2     | 30    | 2     | 7     | 9     | 555   |
| GCA | 211 | 29    |       |       |       | 1,830 | 7     | 29    | 10    | 10    | 3     |     | 1     | 57    |       | 6     |       | 16    |       | 1     |       |
| GCC | 121 |       | 9     | 1     | 1     | 4     | 1,040 | 3     | 34    | 1     | 10    |     | 1     |       | 11    | 1     | 1     |       | 3     | 1     |       |
| GCG | 53  |       |       | 16    | 2     | 27    |       | 346   | 7     | 3     |       | 5   |       |       |       | 31    |       |       |       | 4     |       |
| GCT | 223 | 1     | 3     |       | 21    | 12    | 41    | 8     | 1,886 | 1     | 5     | 2   | 14    | 1     |       |       | 43    | 4     |       | 1     | 5     |
| GGA | 267 | 46    |       | 3     | 3     | 12    |       | 2     | 1     | 1,202 | 4     | 14  | 14    | 6     | 1     |       |       | 23    | 1     | 2     | 1     |
| GGC | 132 | 6     | 39    | 1     | 5     |       | 4     |       |       | 6     | 895   | 8   | 29    |       | 1     |       | 1     |       | 12    |       |       |
| GGG | 161 | 1     | 1     | 33    | 7     | 1     | 2     | 4     | 1     | 10    | 6     | 730 | 11    |       |       | 8     |       | 1     | 2     | 20    |       |
| GGT | 291 | 2     | 2     | 6     | 41    |       |       |       | 12    | 9     | 17    | 9   | 1,616 |       | 1     | 2     | 16    |       |       |       | 25    |
| GTA | 83  | 8     |       | 1     | 1     | 30    |       |       |       | 3     | 2     |     | 1     | 1,368 | 3     | 24    | 15    | 4     |       |       |       |
| GTC | 59  |       | 1     | 1     |       |       | 16    |       |       |       | 1     |     | 1     | 7     | 1,154 | 8     | 32    | 3     | 1     | 1     | 1     |
| GTG | 134 | 3     |       | 14    |       | 5     | 1     | 29    |       |       |       | 5   | 3     | 38    | 7     | 1,392 | 13    |       | 1     | 6     | 1     |
| GTT | 201 | 3     |       |       | 11    | 4     | 4     |       | 31    | 1     | 1     |     | 22    | 27    | 27    | 9     | 2,615 | 1     |       |       | 2     |
| TAA | 26  | 34    |       |       |       |       |       |       |       |       |       |     |       | 1     |       |       |       | 68    | 2     |       |       |
| TAC | 90  | 9     | 243   | 8     | 4     |       | 1     |       |       |       | 4     | 1   |       |       | 5     |       |       | 13    | 561   | 4     | 25    |
| TAG | 20  |       |       | 19    |       |       |       |       |       |       |       |     |       |       |       |       |       | 2     |       | 59    |       |
| TAT | 143 | 3     | 9     |       | 453   |       |       | 5     | 3     |       | 1     |     | 8     | 4     |       | 1     | 10    | 8     | 20    |       | 1,155 |
| TCA | 208 | 12    | 1     |       | 2     | 444   | 7     | 9     | 4     | 4     |       | 2   |       | 12    | 3     | 1     |       | 7     |       |       | 1     |
| TCC | 110 |       | 9     |       | 1     | 2     | 219   |       | 11    |       | 8     |     |       |       | 3     |       |       | 2     | 3     | 1     |       |
| TCG | 63  |       |       | 3     | 1     | 4     | 3     | 91    | 1     | 2     |       | 3   |       |       |       | 8     | 1     |       | 1     | 4     |       |
| TCT | 346 |       | 1     |       | 20    | 2     | 15    | 1     | 493   |       | 2     |     | 14    | 3     |       |       | 6     |       |       |       | 25    |
| TGA | 34  |       |       |       |       |       |       |       |       | 16    |       |     | 1     |       |       | 1     |       | 10    |       |       |       |
| TGC | 80  |       | 8     |       |       | 1     | 3     |       |       | 1     | 154   | 1   | 6     |       | 2     | 1     |       |       | 34    | 1     |       |
| TGG | 94  | 1     |       | 7     |       |       |       | 1     |       | 2     | 3     | 201 |       |       |       | 9     |       | 4     | 1     | 57    |       |
| TGT | 117 |       | 1     |       | 5     | 1     | 1     |       | 2     | 2     | 3     | 1   | 300   |       |       |       | 8     | 4     | 3     | 2     | 55    |
| TTA | 118 | 6     | 1     |       | 2     | 10    | 1     | 1     | 1     | 2     |       |     |       | 369   | 10    | 8     | 10    | 3     |       |       | 1     |
| TTC | 165 | 1     | 2     |       | 2     |       | 5     |       |       | 1     |       |     | 1     | 3     | 252   | 6     | 13    | 3     | 14    |       | 2     |
| TTG | 187 |       |       | 8     | 2     | 3     |       | 11    | 4     |       |       | 3   |       | 10    |       | 615   | 6     | 2     |       | 11    |       |
| TTT | 292 |       |       | 2     | 6     |       | 1     |       | 16    |       |       |     | 4     | 5     | 8     | 5     | 548   | 2     | 1     | 1     | 11    |

Amino acid changes

How to read this table:

- Rows are reference amino acids and columns are changed amino acids. E.g. Row 'A' column 'E' indicates how many 'A' amino acids have been replaced by 'E' amino acids.
- Red background colors indicate that more changes happened (heat-map).
- Diagonals are indicated using grey background color
- WARNING: This table may include different translation codon tables (e.g. mammalian DNA and mitochondrial DNA).

|   | *   | -   | ?     | A      | C     | D   | E   | F   | G     | H   | I   | K   | L   | M  | N   | P     | Q   | R     | S     | T     |
|---|-----|-----|-------|--------|-------|-----|-----|-----|-------|-----|-----|-----|-----|----|-----|-------|-----|-------|-------|-------|
| * | 341 | 65  | 15    |        | 14    | 1   | 55  | 4   | 23    | 2   | 1   | 53  | 69  | 1  | 4   | 139   | 91  | 62    |       |       |
| - | 62  |     | 2,128 | 236    | 66    | 211 | 316 | 172 | 295   | 179 | 149 | 240 | 301 | 67 | 202 | 321   | 229 | 200   | 525   | 246   |
| ? |     |     |       |        |       |     |     |     |       |     |     |     |     |    |     |       |     |       |       |       |
| A | 8   | 577 | 31    | 18,121 | 26    | 612 | 878 | 27  | 1,744 | 11  | 113 | 47  | 69  | 38 | 36  | 1,276 | 27  | 32    | 2,059 | 5,284 |
| C | 99  | 184 | 13    | 9      | 3,129 | 13  | 3   | 536 | 380   | 93  | 10  |     | 42  | 1  | 14  | 20    | 7   | 1,332 | 1,205 | 8     |

|   | *   | -   | ?  | A     | C     | D            | E            | F            | G             | H            | I            | K            | L             | M          | N            | P             | Q            | R            | S             | T             |
|---|-----|-----|----|-------|-------|--------------|--------------|--------------|---------------|--------------|--------------|--------------|---------------|------------|--------------|---------------|--------------|--------------|---------------|---------------|
| D | 15  | 470 | 22 | 560   | 25    | <b>7,370</b> | 3,344        | 13           | 1,977         | 788          | 38           | 59           | 15            | 3          | 3,401        | 10            | 15           | 28           | 101           | 24            |
| E | 312 | 649 | 35 | 879   | 1     | 3,400        | <b>6,156</b> | 10           | 2,308         | 16           | 15           | 4,501        | 42            | 14         | 88           | 14            | 1,722        | 122          | 12            | 33            |
| F | 12  | 423 | 34 | 24    | 546   | 20           | 2            | <b>5,893</b> | 12            | 28           | 829          | 3            | 3,809         | 11         | 10           | 33            | 6            | 8            | 1,519         | 22            |
| G | 122 | 805 | 46 | 1,732 | 542   | 2,127        | 2,164        | 19           | <b>13,757</b> | 45           | 26           | 98           | 24            | 10         | 98           | 10            | 46           | 2,864        | 2,624         | 39            |
| H | 10  | 236 | 17 | 25    | 129   | 666          | 26           | 28           | 36            | <b>3,458</b> | 7            | 13           | 512           | 2          | 803          | 382           | 1,542        | 2,140        | 47            | 17            |
| I | 5   | 351 | 32 | 75    | 6     | 21           | 11           | 882          | 31            | 14           | <b>8,588</b> | 373          | 1,565         | 2,392      | 684          | 22            | 10           | 312          | 592           | 2,801         |
| K | 227 | 625 | 43 | 42    | 2     | 60           | 4,026        | 3            | 75            | 21           | 396          | <b>6,423</b> | 23            | 563        | 2,818        | 3             | 1,378        | 3,245        | 66            | 1,004         |
| L | 228 | 723 | 64 | 51    | 42    | 8            | 25           | 4,172        | 23            | 489          | 1,700        | 26           | <b>27,536</b> | 1,093      | 11           | 2,641         | 681          | 760          | 2,495         | 63            |
| M | 5   | 238 | 14 | 27    | 4     | 7            | 24           | 18           | 10            | 5            | 2,628        | 488          | 1,177         | <b>105</b> | 54           | 8             | 9            | 319          | 21            | 1,468         |
| N | 8   | 440 | 24 | 24    | 19    | 3,181        | 71           | 14           | 80            | 753          | 701          | 2,733        | 11            | 11         | <b>6,334</b> | 7             | 40           | 61           | 3,095         | 943           |
| P | 16  | 644 | 27 | 1,254 | 13    | 8            | 12           | 27           | 15            | 452          | 12           | 9            | 3,013         | 4          | 19           | <b>15,176</b> | 683          | 784          | 3,218         | 933           |
| Q | 746 | 367 | 23 | 19    | 3     | 27           | 1,598        | 4            | 39            | 1,566        | 8            | 1,294        | 765           | 5          | 25           | 646           | <b>4,828</b> | 2,960        | 32            | 16            |
| R | 517 | 403 | 38 | 33    | 1,778 | 36           | 82           | 25           | 2,609         | 2,484        | 342          | 3,131        | 792           | 275        | 63           | 758           | 3,252        | <b>9,727</b> | 1,562         | 734           |
| S | 258 | 938 | 42 | 2,000 | 1,577 | 71           | 31           | 1,880        | 2,623         | 66           | 681          | 86           | 2,800         | 17         | 3,024        | 2,904         | 17           | 1,505        | <b>20,905</b> | 2,481         |
| T | 3   | 431 | 26 | 4,992 | 5     | 28           | 37           | 26           | 46            | 14           | 3,077        | 982          | 50            | 1,446      | 1,050        | 870           | 16           | 716          | 2,564         | <b>14,994</b> |
| V | 1   | 444 | 33 | 4,700 | 16    | 442          | 581          | 1,050        | 1,033         | 6            | 5,306        | 30           | 3,056         | 1,433      | 13           | 30            | 15           | 27           | 66            | 120           |
| W | 488 | 87  | 7  | 4     | 293   | 1            | 8            | 14           | 166           | 1            |              | 8            | 303           | 9          |              | 6             | 61           | 851          | 173           | 1             |
| Y | 363 | 209 | 24 | 7     | 1,443 | 664          | 25           | 1,095        | 24            | 1,761        | 19           | 20           | 60            | 1          | 709          | 6             | 25           | 36           | 666           | 9             |

Variants by chromosome

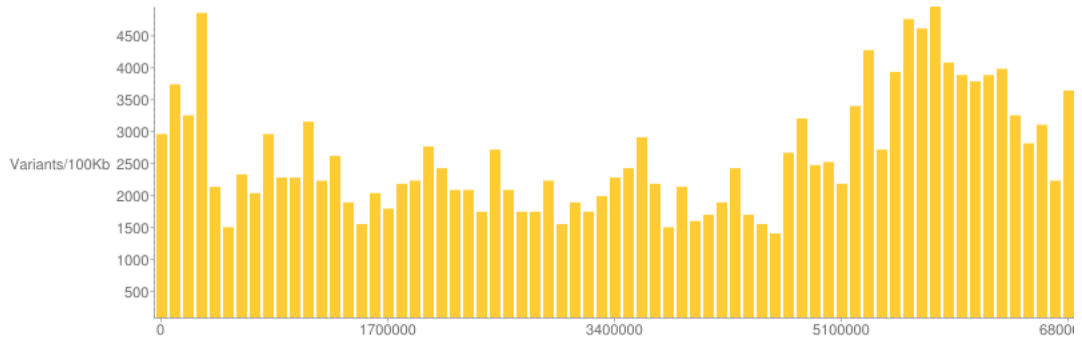

1, Position,0,100000,200000,300000,400000,500000,600000,700000,800000,900000,1000000,1100000,1200000,1300000,1400000,1500000,1600000,1700000,1800000,1900000,2000000,2100000,2200000,2300000,2400000,2500000,2600000,2700000,2800000,2900000,3000000,3100000,3200000,3300000,3400000,3500000,3600000,3700000,3800000,3900000,4000000,4100000,4200000,4300000,4400000,4500000,4600000,4700000,4800000,4900000,5000000,5100000,5200000,5300000,5400000,5500000,5600000,5700000,5800000,5900000,6000000,6100000,6200000,6300000,6400000,6500000,6600000,6700000,6800000,6900000,7000000,7100000,7200000,7300000,7400000,7500000,7600000,7700000,7800000,7900000,8000000,8100000,8200000,8300000,8400000,8500000,8600000,8700000,8800000,8900000,9000000,9100000,9200000,9300000,9400000,9500000,9600000,9700000,9800000,9900000,10000000,Count,2972,3768,3277,4870,2163,1506,2372,2033,2991,2322,2312,3193,2245,2622,1932,1573,2063,1827,2222,2259,2798,2454,2096,2092,1752,2732,2121,1750,

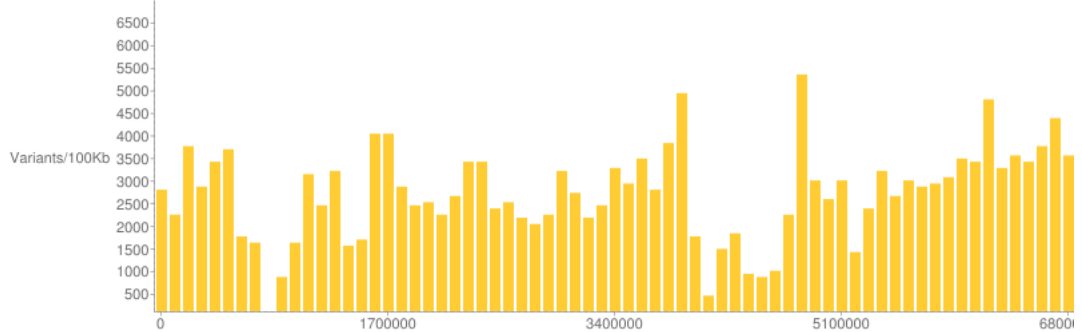

2, Position,0,100000,200000,300000,400000,500000,600000,700000,800000,900000,1000000,1100000,1200000,1300000,1400000,1500000,1600000,1700000,1800000,1900000,2000000,2100000,2200000,2300000,2400000,2500000,2600000,2700000,2800000,2900000,3000000,3100000,3200000,3300000,3400000,3500000,3600000,3700000,3800000,3900000,4000000,4100000,4200000,4300000,4400000,4500000,4600000,4700000,4800000,4900000,5000000,5100000,5200000,5300000,5400000,5500000,5600000,5700000,5800000,5900000,6000000,6100000,6200000,6300000,6400000,6500000,6600000,6700000,6800000,6900000,7000000,7100000,7200000,7300000,7400000,7500000,7600000,7700000,7800000,7900000,8000000,8100000,8200000,8300000,8400000,8500000,8600000,8700000,8800000,8900000,9000000,9100000,9200000,9300000,9400000,9500000,9600000,9700000,9800000,9900000,10000000,Count,2858,2251,3809,2930,3484,3730,1778,1660,113,916,1646,3175,2491,3233,1613,1742,4046,4043,2888,2482,2561,2311,2703,3468,3457,2440,2566,2190,20,

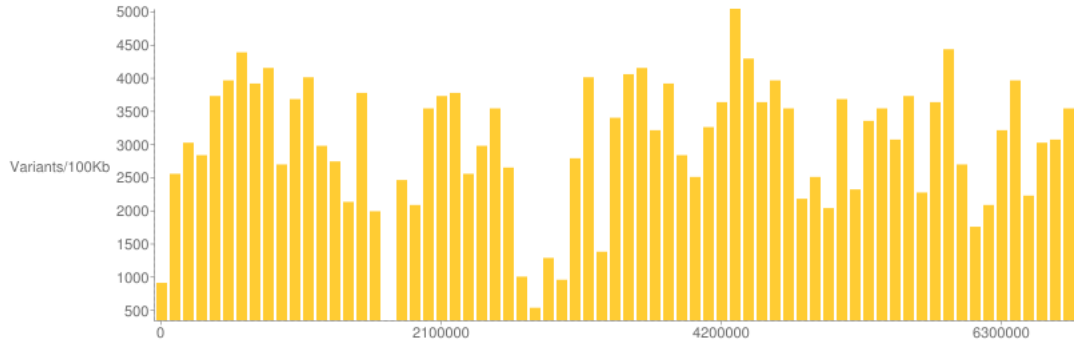

3, Position,0,100000,200000,300000,400000,500000,600000,700000,800000,900000,1000000,1100000,1200000,1300000,1400000,1500000,1600000  
 3,Count,920,2584,3054,2855,3757,3974,4386,3914,4193,2722,3713,4044,2999,2781,2157,3791,2015,344,2489,2080,3553,3735,3780,2559,3017,3540,2661,1016,52

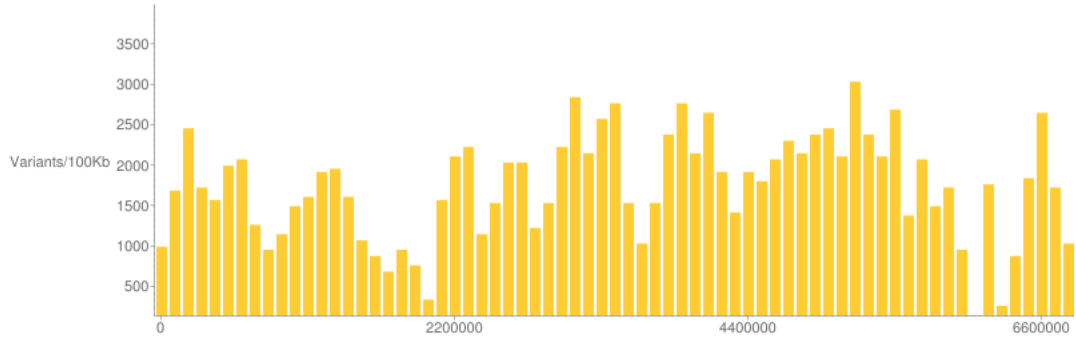

4, Position,0,100000,200000,300000,400000,500000,600000,700000,800000,900000,1000000,1100000,1200000,1300000,1400000,1500000,1600000  
 4,Count,1004,1677,2464,1728,1563,2017,2066,1272,970,1150,1486,1614,1939,1964,1608,1064,870,689,977,769,365,1569,2133,2233,1152,1522,2056,2043,1237,1

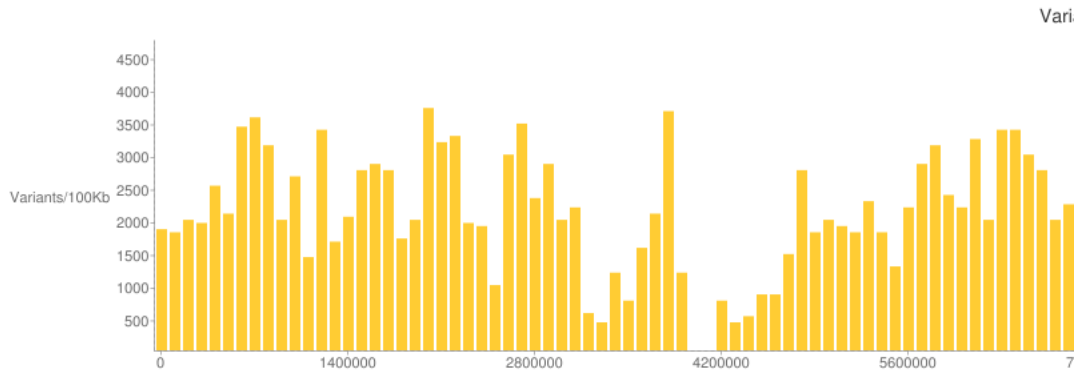

5, Position,0,100000,200000,300000,400000,500000,600000,700000,800000,900000,1000000,1100000,1200000,1300000,1400000,1500000,1600000  
 5,Count,1920,1869,2062,2002,2568,2135,3481,3644,3224,2064,2732,1475,3417,1745,2110,2834,2919,2830,1773,2038,3796,3260,3325,2005,1943,1062,3068,3528,1



Variants histogram: 6

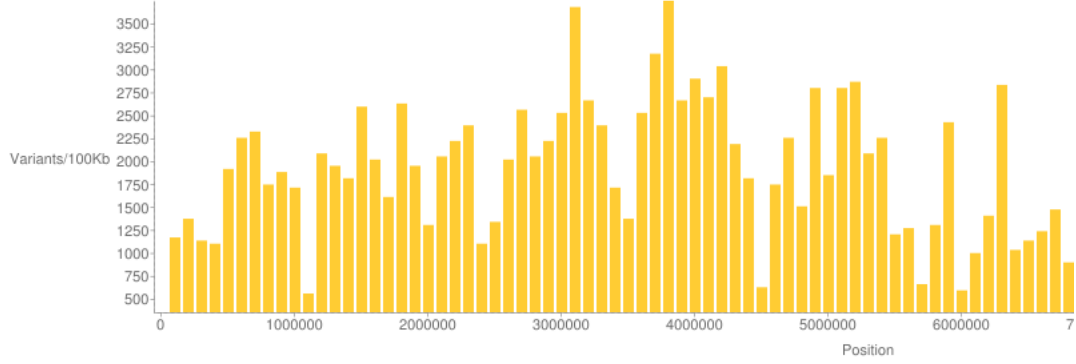

6, Position,0,100000,200000,300000,400000,500000,600000,700000,800000,900000,1000000,1100000,1200000,1300000,1400000,1500000,1600000, Count,370,1178,1380,1159,1130,1917,2266,2350,1750,1906,1716,563,2091,1961,1816,2612,2020,1613,2635,1968,1315,2083,2228,2400,1115,1370,2040,2582,20

Variants histogr

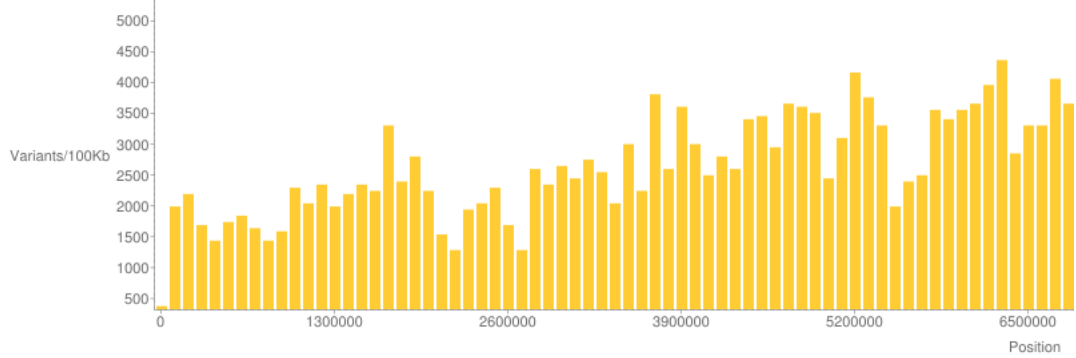

7, Position,0,100000,200000,300000,400000,500000,600000,700000,800000,900000,1000000,1100000,1200000,1300000,1400000,1500000,1600000, Count,397,1991,2205,1695,1427,1756,1872,1653,1448,1583,2296,2051,2347,2014,2218,2381,2279,3338,2421,2791,2278,1575,1284,1976,2059,2289,1712,1280,2

8, Position,0,100000,200000,300000,400000,500000,600000,700000,800000,900000,1000000,1100000,1200000,1300000,1400000,1500000,1600000, Count,2682,1642,2886,2396,1649,2230,2391,1835,2043,1594,2688,2463,1610,1663,2039,1310,1162,1238,1400,2105,3511,4924,4353,4943,3199,4473,4283,4478,2

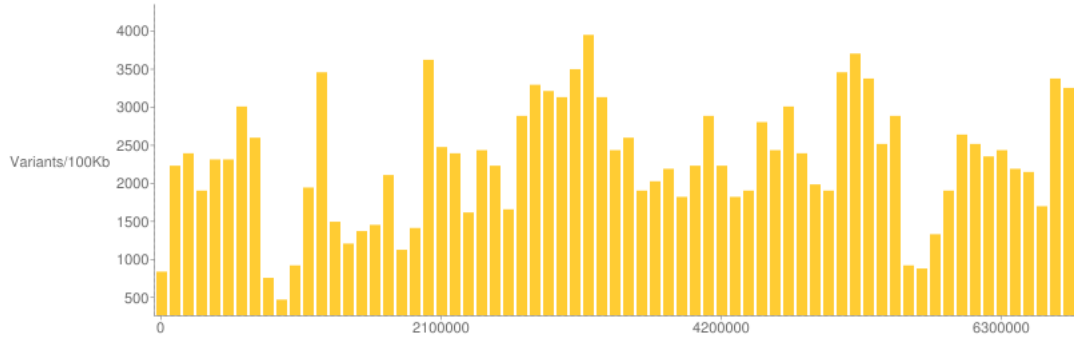

9, Position,0,100000,200000,300000,400000,500000,600000,700000,800000,900000,1000000,1100000,1200000,1300000,1400000,1500000,1600000, Count,838,2233,2405,1919,2307,2311,3021,2614,759,472,914,1950,3481,1487,1218,1388,1486,2141,1143,1410,3639,2476,2401,1613,2435,2248,1651,2879,3288

Variants histogram: 10

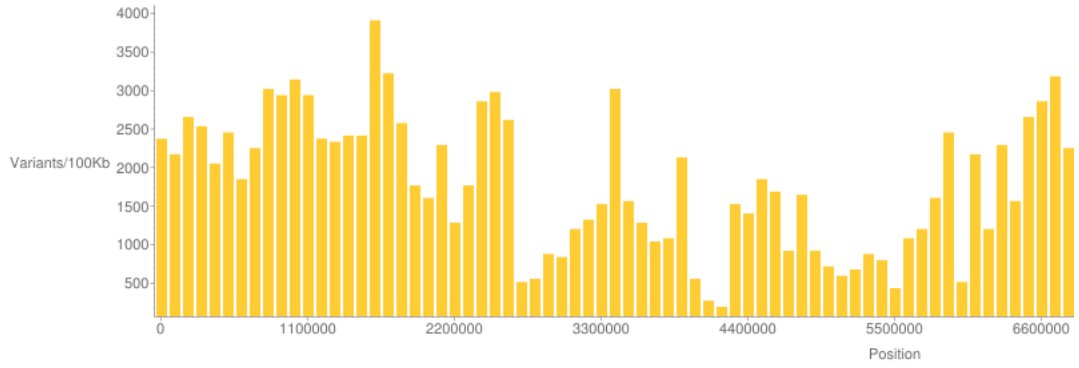

10, Position,0,100000,200000,300000,400000,500000,600000,700000,800000,900000,1000000,1100000,1200000,1300000,1400000,1500000,1600000  
 10, Count,2372,2202,2651,2558,2079,2485,1881,2272,3016,2944,3156,2969,2369,2350,2418,2431,3921,3244,2589,1797,1620,2305,1278,1779,2884,2992,2630,510,

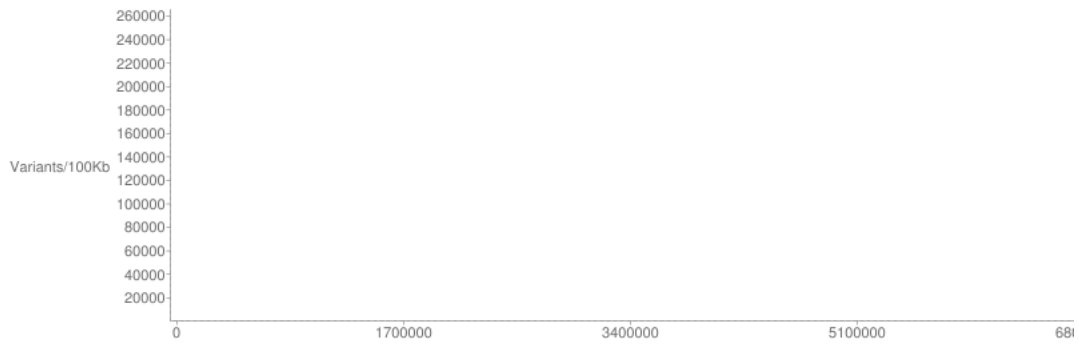

11, Position,0,100000,200000,300000,400000,500000,600000,700000,800000,900000,1000000,1100000,1200000,1300000,1400000,1500000,1600000  
 11, Count,2313,1910,1794,2412,2066,2072,1895,2009,1960,1611,1380,1884,1704,1165,1764,2015,2367,2238,2045,1606,2685,2146,2170,2173,2465,2467,1793,2440,

Varian

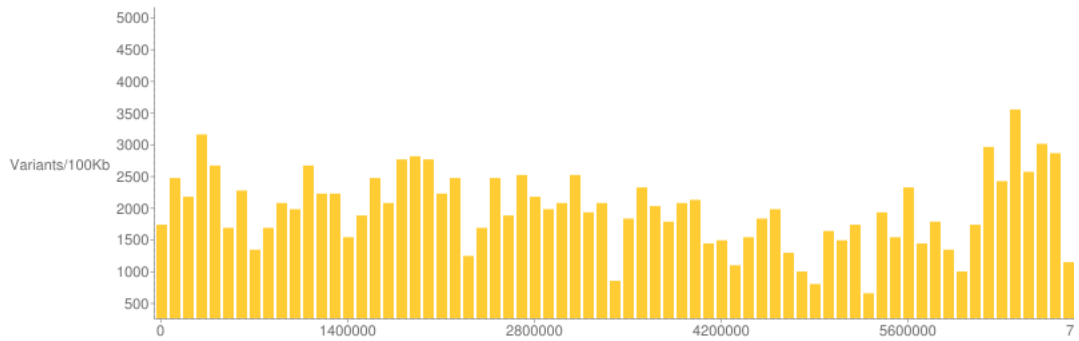

12, Position,0,100000,200000,300000,400000,500000,600000,700000,800000,900000,1000000,1100000,1200000,1300000,1400000,1500000,1600000  
 12, Count,1770,2503,2206,3202,2701,1688,2299,1379,1712,2119,2021,2664,2227,2224,1569,1916,2515,2102,2785,2836,2798,2244,2486,1284,1707,2490,1922,2555,

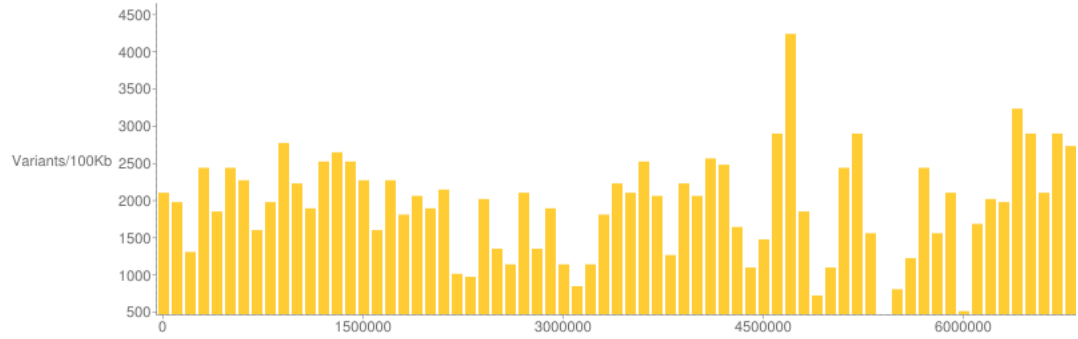

13, Position,0,100000,200000,300000,400000,500000,600000,700000,800000,900000,1000000,1100000,1200000,1300000,1400000,1500000,1600000  
13, Count,2124,1996,1336,2449,1885,2455,2265,1624,1980,2803,2229,1888,2541,2673,2556,2285,1636,2292,1811,2085,1929,2162,1050,1001,2051,1345,1151,2134

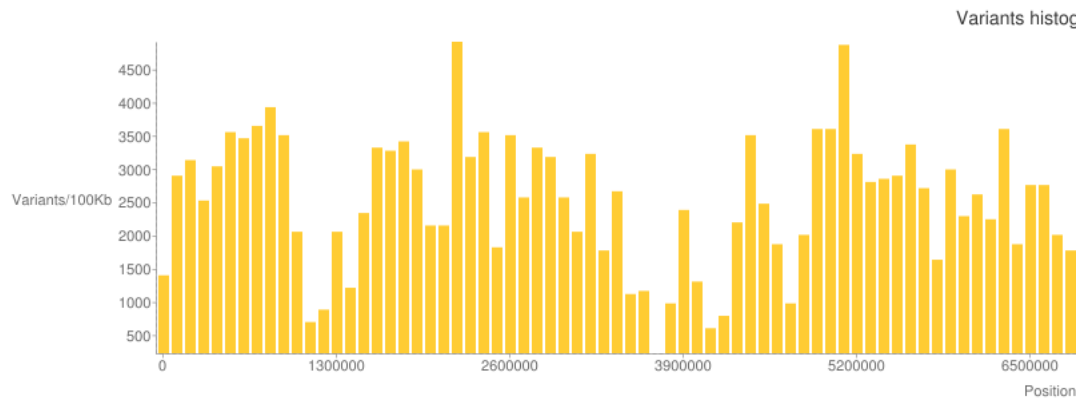

14, Position,0,100000,200000,300000,400000,500000,600000,700000,800000,900000,1000000,1100000,1200000,1300000,1400000,1500000,1600000  
14, Count,1417,2906,3153,2532,3046,3590,3489,3682,3935,3543,2068,722,887,2075,1249,2345,3323,3303,3429,3003,2171,2159,4915,3185,3581,1843,3548,2615,3

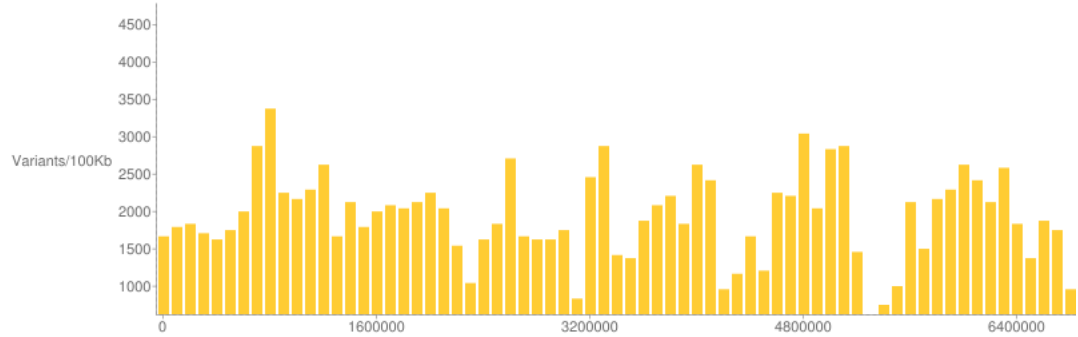

15, Position,0,100000,200000,300000,400000,500000,600000,700000,800000,900000,1000000,1100000,1200000,1300000,1400000,1500000,1600000  
15, Count,1689,1809,1831,1716,1640,1760,1998,2892,3381,2249,2194,2319,2640,1669,2137,1811,2020,2096,2046,2127,2256,2049,1565,1068,1644,1863,2727,1672

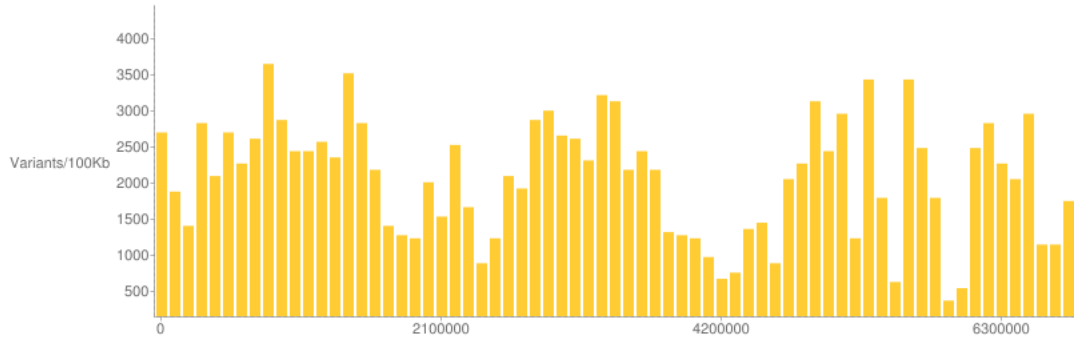

16, Position,0,100000,200000,300000,400000,500000,600000,700000,800000,900000,1000000,1100000,1200000,1300000,1400000,1500000,1600000  
 16, Count,2700,1892,1435,2859,2092,2696,2289,2610,3658,2867,2447,2449,2582,2357,3520,2859,2215,1434,1301,1250,2016,1552,2548,1661,889,1249,2094,1934,

17, Position,0,100000,200000,300000,400000,500000,600000,700000,800000,900000,1000000,1100000,1200000,1300000,1400000,1500000,1600000  
 17, Count,2148,1285,2317,2320,1542,1713,2329,2272,2284,1588,2333,3296,2700,3151,3303,2914,2837,1287,1495,3364,2650,2669,2756,2712,2531,4535,3230,3253

18, Position,0,100000,200000,300000,400000,500000,600000,700000,800000,900000,1000000,1100000,1200000,1300000,1400000,1500000,1600000  
 18, Count,1099,1107,1631,187,626,1766,1266,559,2519,2365,3083,3136,3698,2255,2254,1613,2339,2442,2145,2622,2737,2774,2907,2762,2080,2333,3232,2033,23

19, Position,0,100000,200000,300000,400000,500000,600000,700000,800000,900000,1000000,1100000,1200000,1300000,1400000,1500000,1600000  
 19, Count,2023,1647,1979,2202,2177,1629,2163,2302,1891,2360,2617,2591,2153,2464,2191,1884,2780,2744,2204,2035,1657,2280,263972,2539,2403,2213,2153,22

20, Position,0,100000,200000,300000,400000,500000,600000,700000,800000,900000,1000000,1100000,1200000,1300000,1400000,1500000,1600000  
 20, Count,2740,2855,1994,2438,1725,2149,1279,1755,428,1976,2140,1497,1643,2556,2223,574,241,471,2528,2440,2496,2557,2289,2831,2090,2120,930,828,1889,

10000001, Position,0,1000000,2000000,3000000,4000000,5000000,6000000,7000000,8000000,9000000,10000000,11000000,12000000,13000000,14000000  
 10000001, Count,23920,19793,18295,15749,26687,14554,12893,19072,6368,13221,9353,284,218,136,1933,206,214,10281,12741,10913,5814,258,180,2337,21461,18

**Details by gene**

[Here](#) you can find a tab-separated table.
